# Supplementary material for: Formal synthesis of (+)-3-epi-eupomatilone-6 and the 3,5-bis-epimer
Source: Royal Society of Chemistry journal article supplement (doi:10.1039/c4ob01078g), 2014-07-10

## Supporting Information

### Formal synthesis of (+)-3-*epi*-eupomatilone-6 and its 3,5-bis-epimer

Sariya Yodwaree,<sup>a</sup> Darunee Soorukram,<sup>\*a</sup> Chutima Kuhakarn,<sup>a</sup> Patoomratana Tuchinda,<sup>a</sup> Vichai Reutrakul,<sup>a</sup> and Manat Pohmakotr<sup>a</sup>

<sup>a</sup>*Department of Chemistry and Center of Excellence for Innovation in Chemistry (PERCH-CIC),  
Faculty of Science, Mahidol University, Rama VI Road, Bangkok 10400, Thailand*

*Fax: +662 354 7151; Tel: +662 201 5148*

*\*E-mail: darunee.soo@mahidol.ac.th*

## Contents

|                                                                           | Page  |
|---------------------------------------------------------------------------|-------|
| <sup>1</sup> H and <sup>13</sup> C NMR spectra of compound <b>8b</b>      | SI-2  |
| <sup>1</sup> H and <sup>13</sup> C NMR spectra of compound <b>9b</b>      | SI-3  |
| <sup>1</sup> H, <sup>13</sup> C, and 2D NMR spectra of compound <b>10</b> | SI-4  |
| <sup>1</sup> H and <sup>13</sup> C NMR spectra of compound <b>7</b>       | SI-6  |
| <sup>1</sup> H and <sup>13</sup> C NMR spectra of compound <b>11</b>      | SI-7  |
| <sup>1</sup> H and <sup>13</sup> C NMR spectra of compound <b>12</b>      | SI-8  |
| <sup>1</sup> H and <sup>13</sup> C NMR spectra of compound <b>5</b>       | SI-9  |
| <sup>1</sup> H and <sup>13</sup> C NMR spectra of compound <b>6</b>       | SI-10 |
| <sup>1</sup> H, <sup>13</sup> C NMR and NOE spectra of compound <b>16</b> | SI-11 |
| <sup>1</sup> H, <sup>13</sup> C NMR and NOE spectra of compound <b>18</b> | SI-13 |
| <sup>1</sup> H, <sup>13</sup> C NMR and NOE spectra of compound <b>19</b> | SI-15 |
| <sup>1</sup> H NMR spectrum of the crude compound <b>20</b>               | SI-17 |
| <sup>1</sup> H, <sup>13</sup> C NMR and NOE spectra of compound <b>3</b>  | SI-18 |
| <sup>1</sup> H, <sup>13</sup> C NMR and NOE spectra of compound <b>4</b>  | SI-20 |
| <sup>1</sup> H and <sup>13</sup> C NMR spectra of compound <b>22</b>      | SI-22 |

$^1\text{H}$  NMR spectrum of **8b** (300 MHz,  $\text{CDCl}_3$ )

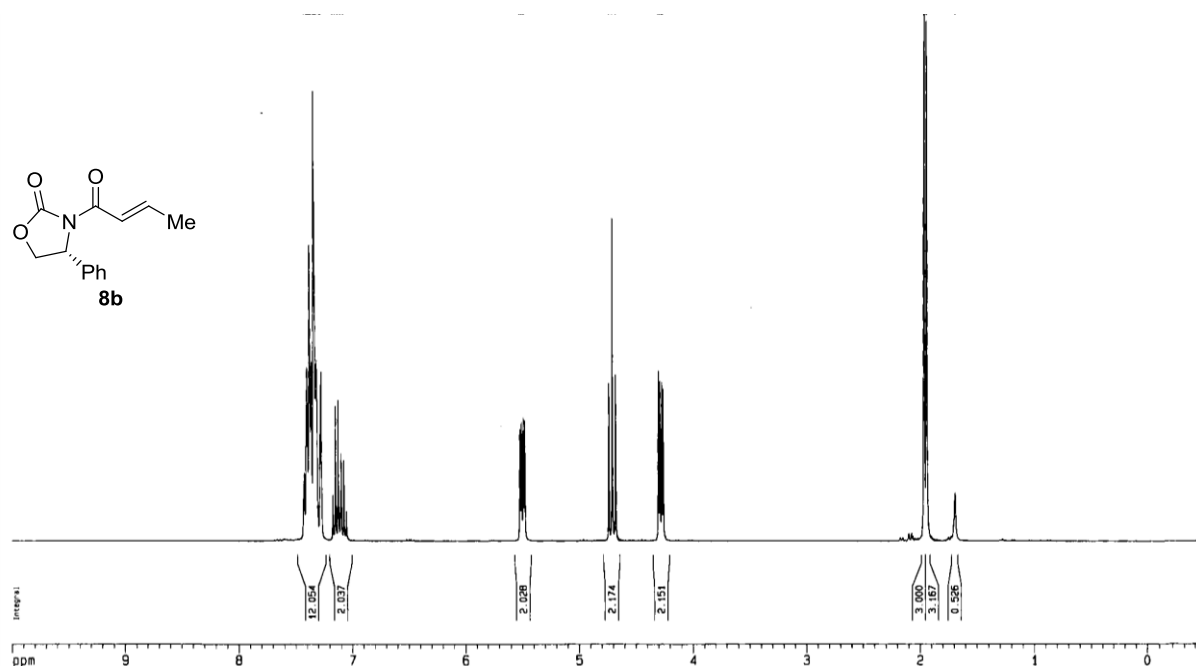

$^{13}\text{C}$  NMR spectrum of **8b** (75 MHz,  $\text{CDCl}_3$ )

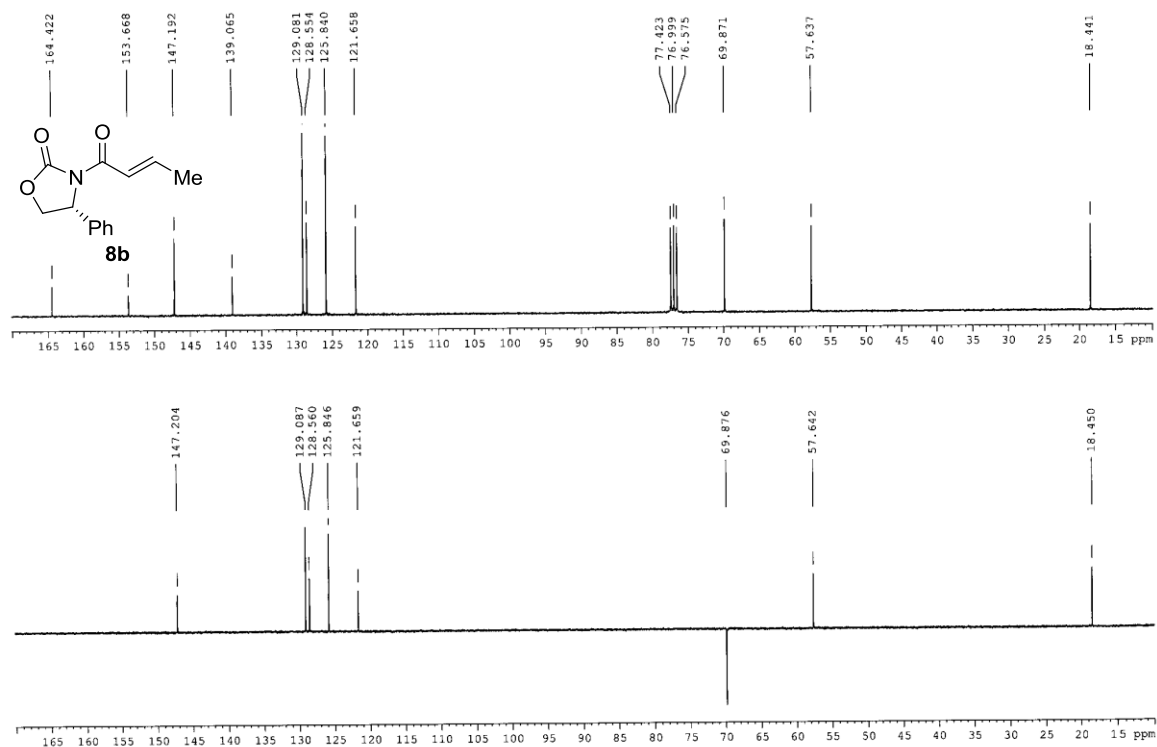

$^1\text{H}$  NMR spectrum of **9b** (500 MHz,  $\text{CDCl}_3$ )

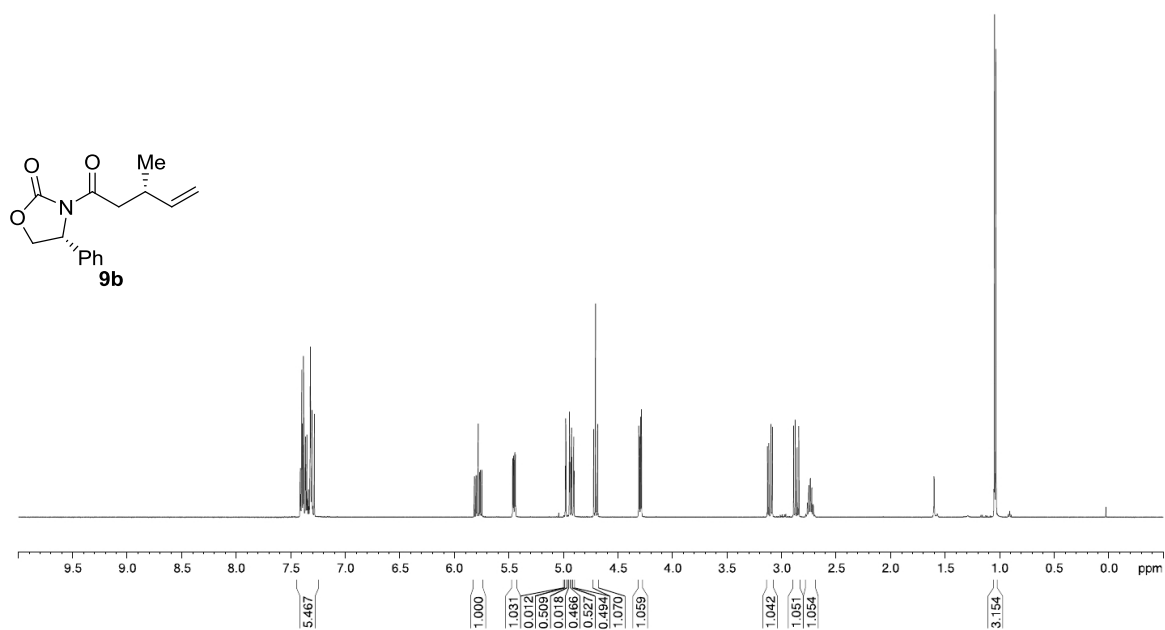

$^{13}\text{C}$  NMR spectrum of **9b** (100 MHz,  $\text{CDCl}_3$ )

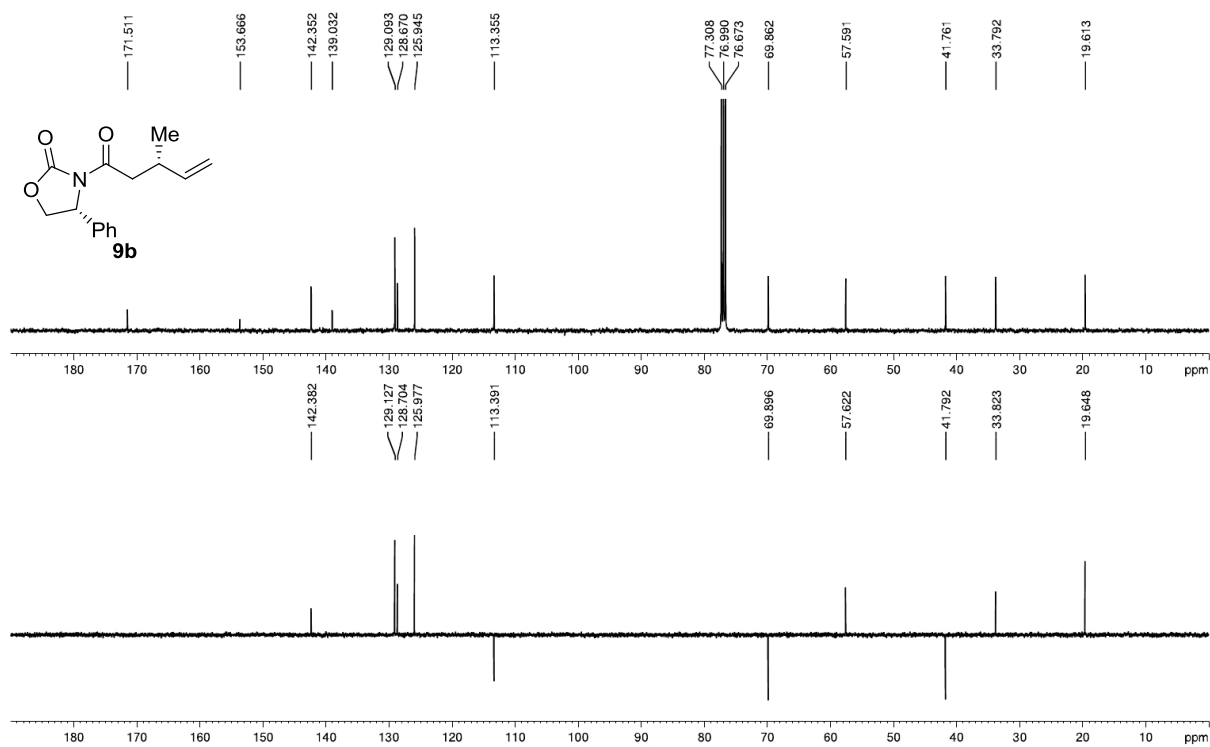

$^1\text{H}$  NMR spectrum of **10** (400 MHz,  $\text{CDCl}_3$ )

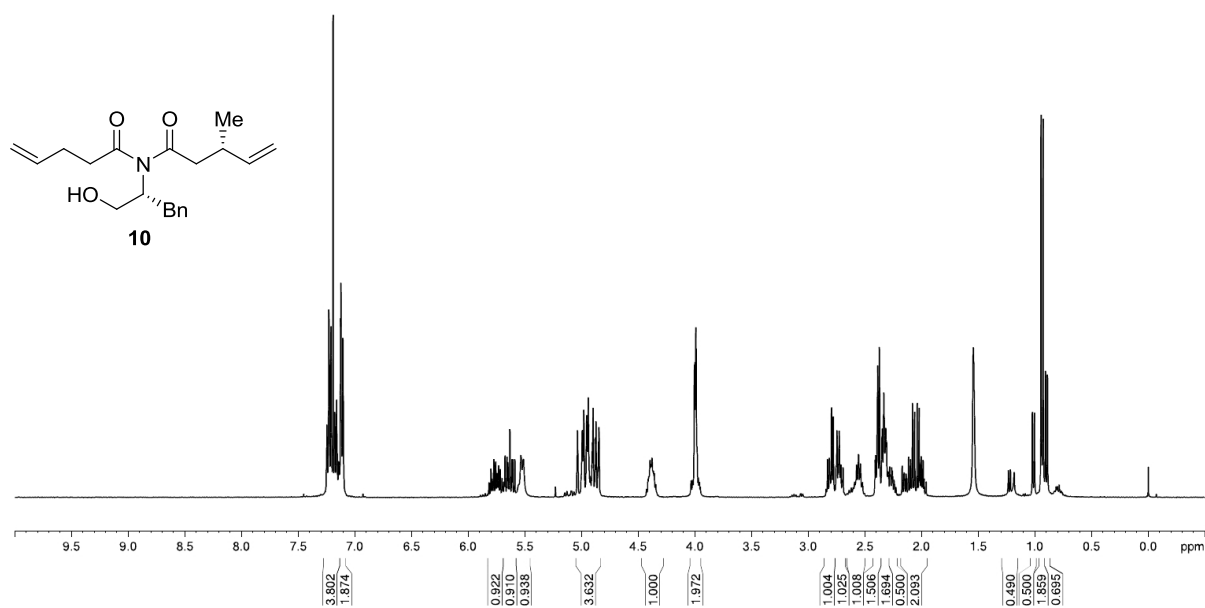

$^{13}\text{C}$  NMR spectrum of **10** (100 MHz,  $\text{CDCl}_3$ )

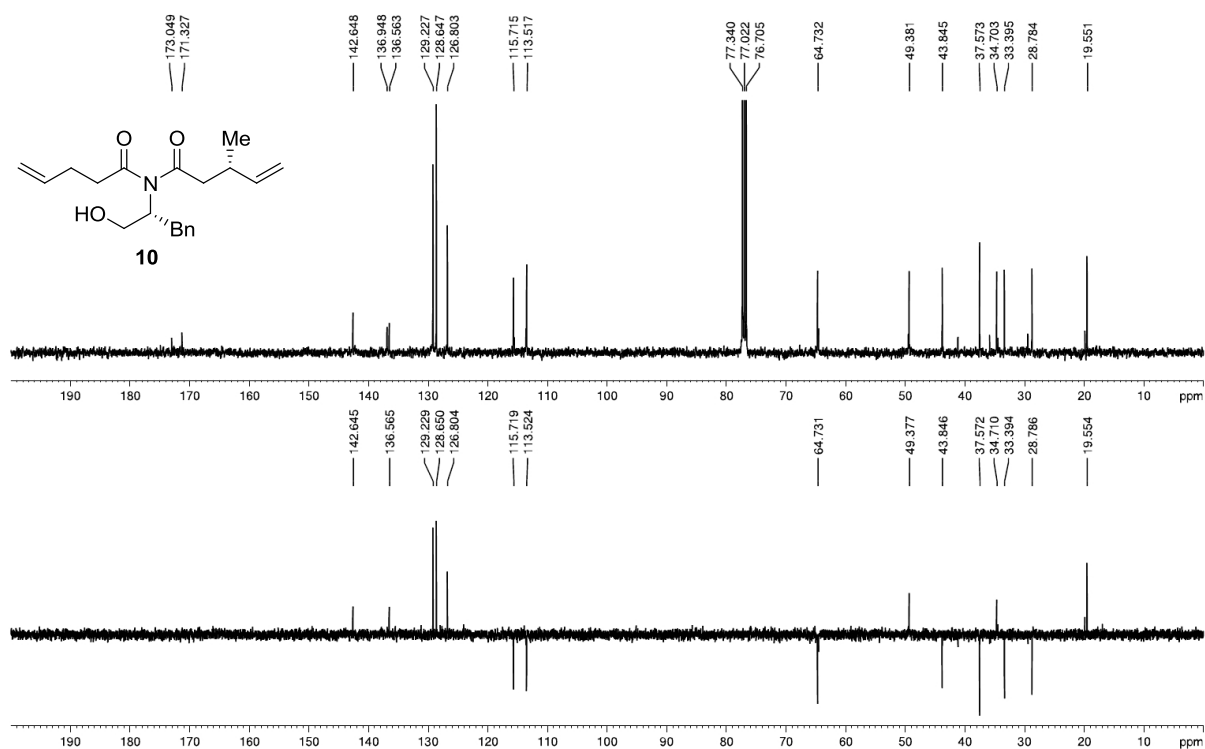

COSY spectrum of **10** (500 MHz, CDCl<sub>3</sub>)

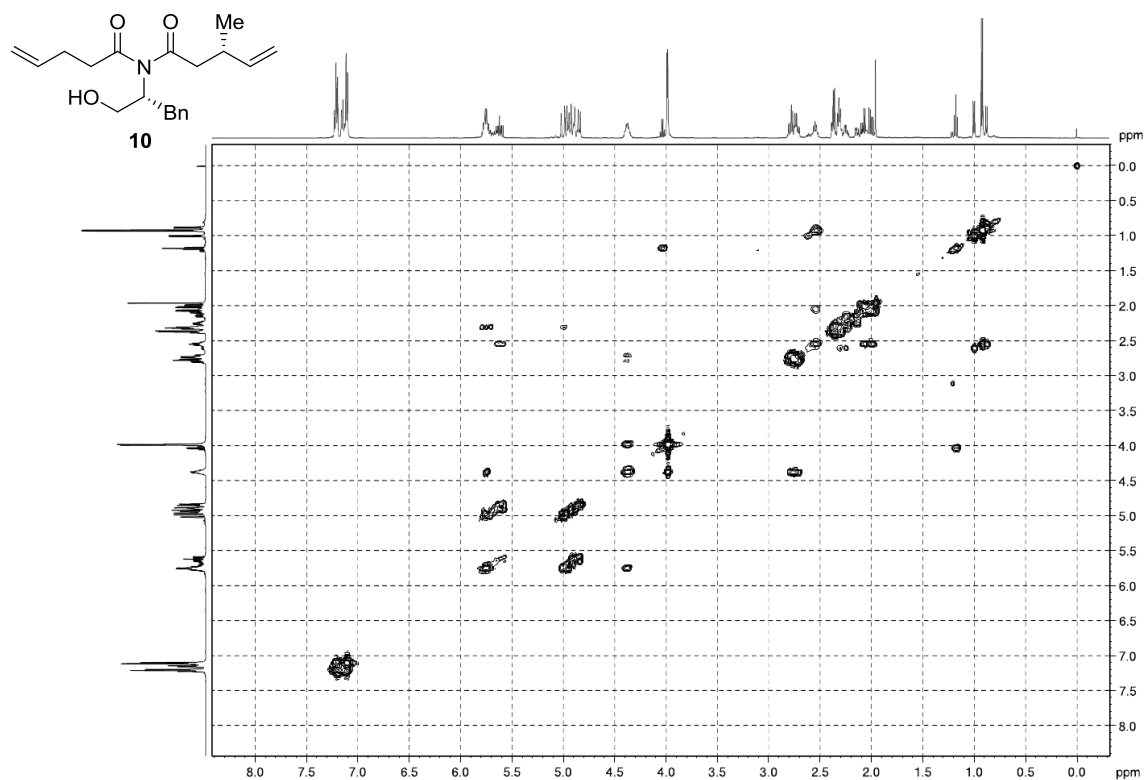

HMQC spectrum of **10** (500 MHz, CDCl<sub>3</sub>)

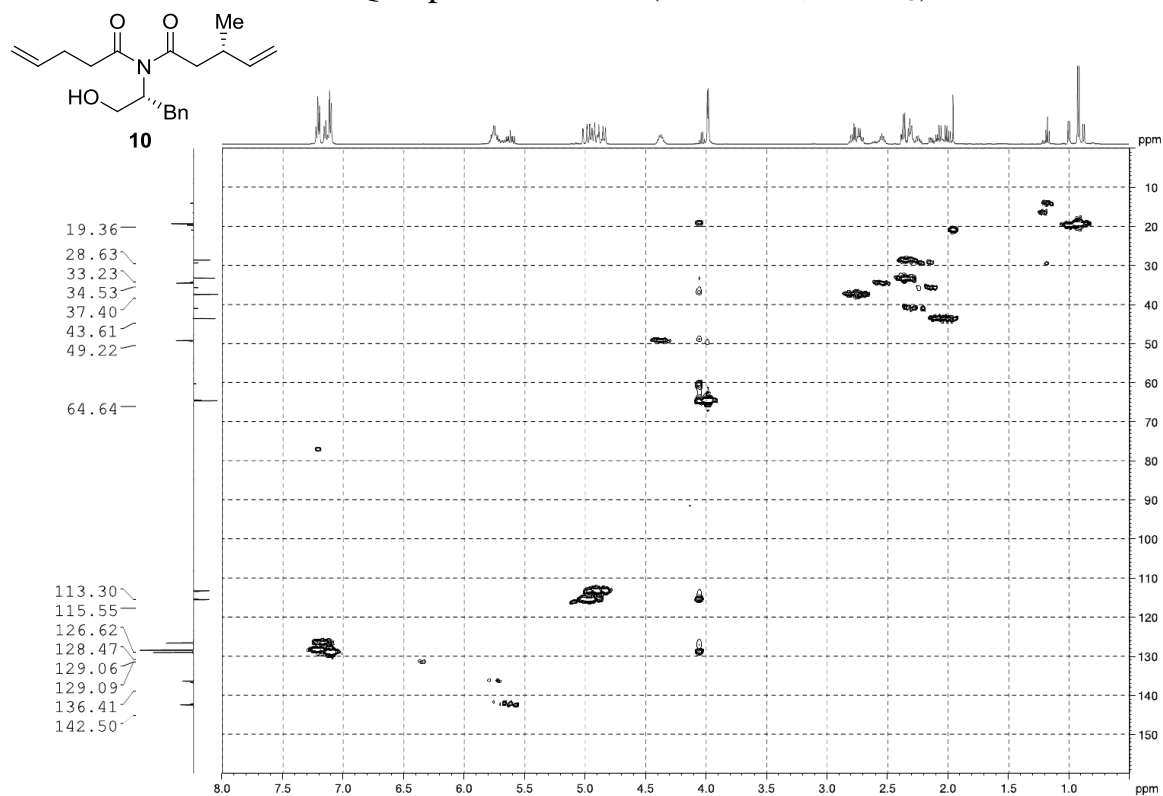

$^1\text{H}$  NMR spectrum of **7** (400 MHz,  $\text{CDCl}_3$ )

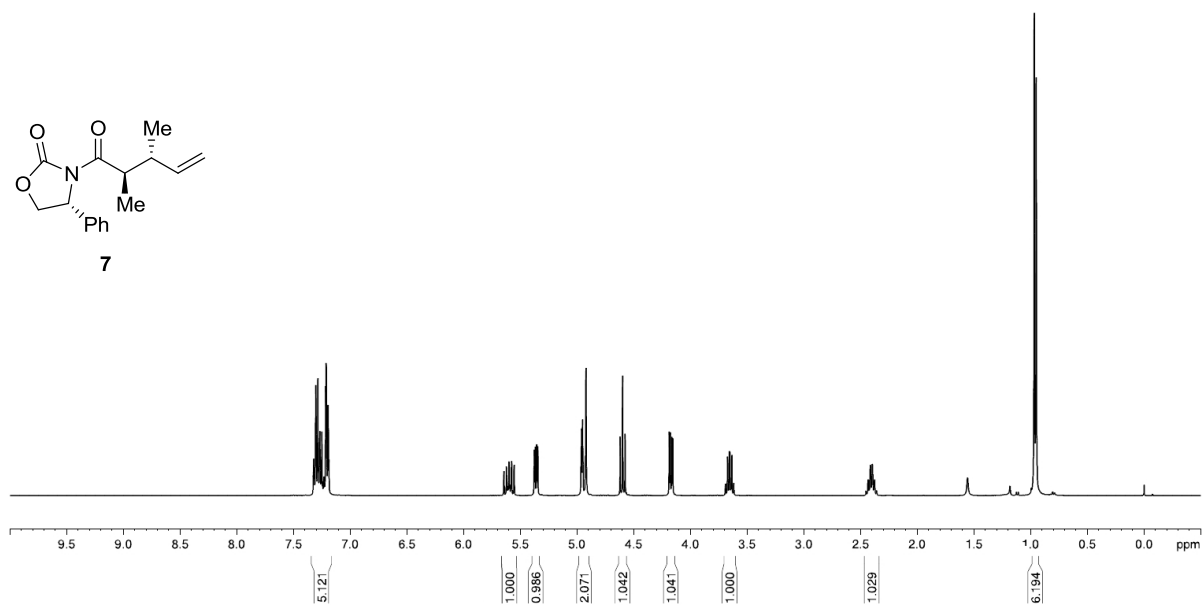

$^{13}\text{C}$  NMR spectrum of **7** (100 MHz,  $\text{CDCl}_3$ )

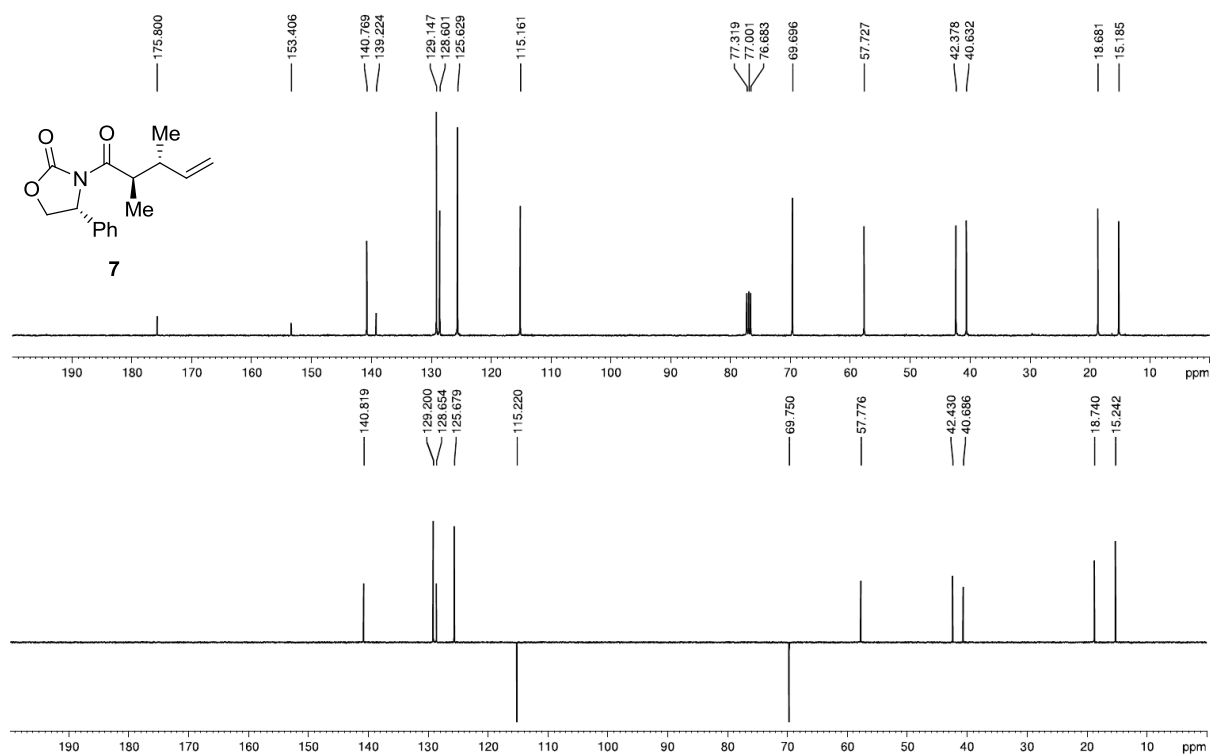

<sup>1</sup>H NMR spectrum of **11** (400 MHz, CDCl<sub>3</sub>)

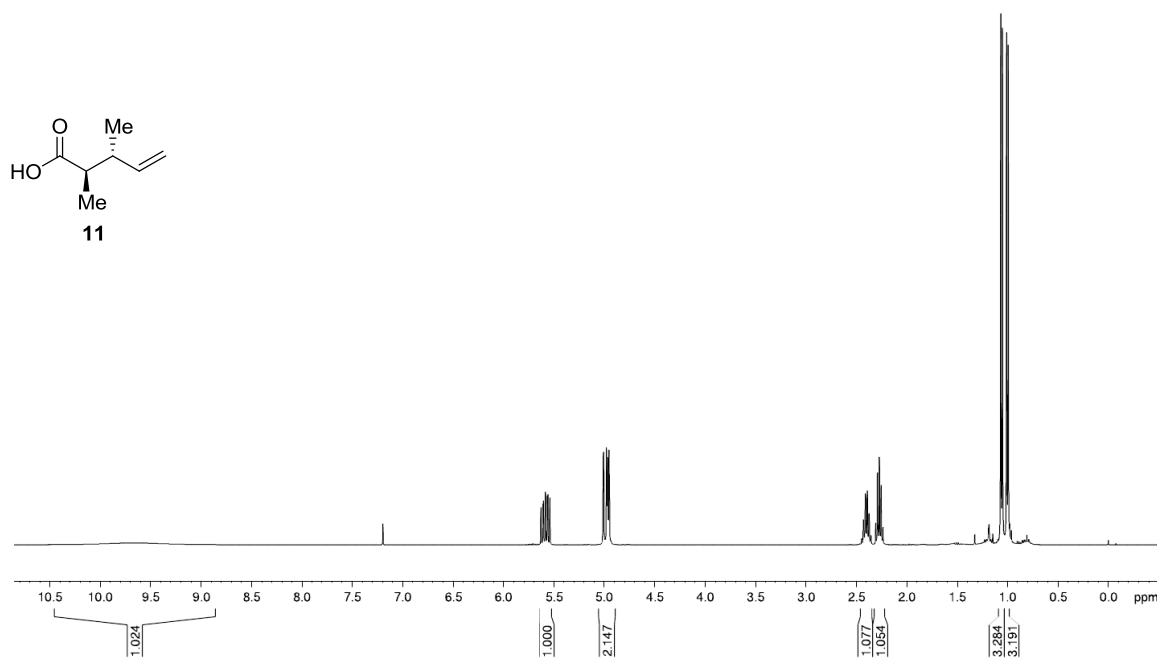

<sup>13</sup>C NMR spectrum of **11** (100 MHz, CDCl<sub>3</sub>)

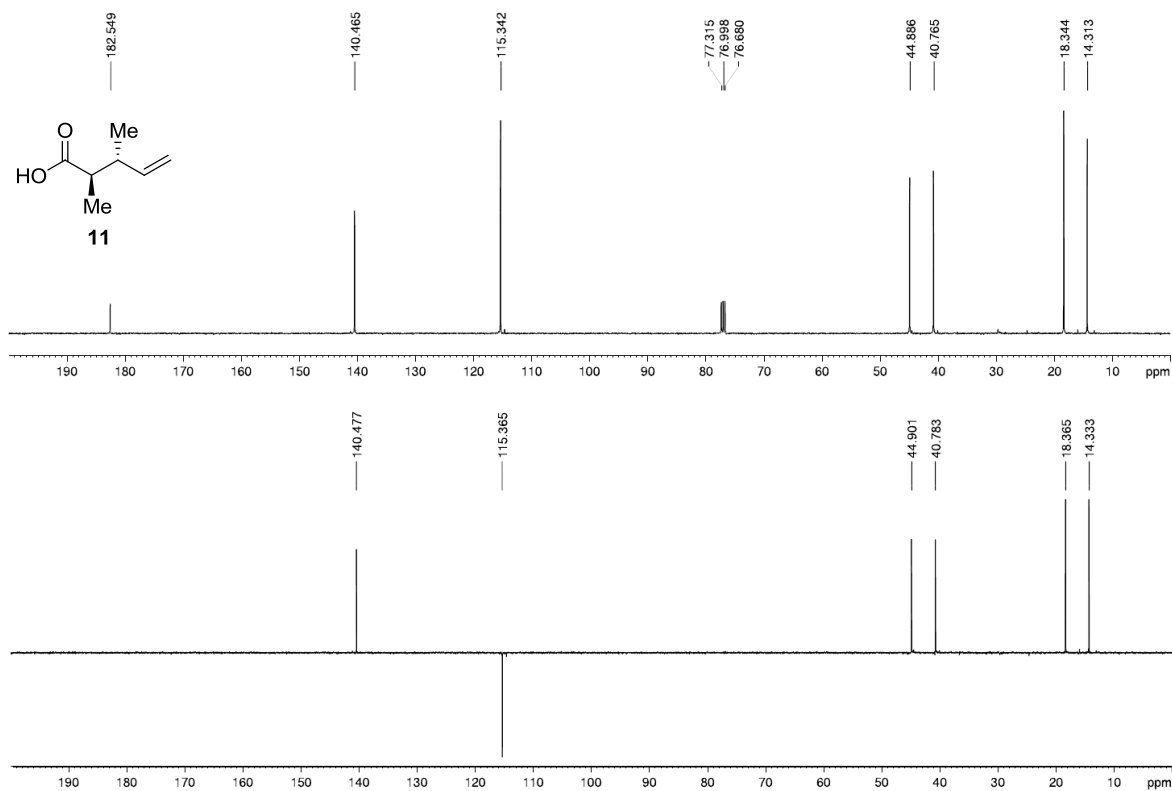

<sup>1</sup>H NMR spectrum of **12** (400 MHz, CDCl<sub>3</sub>)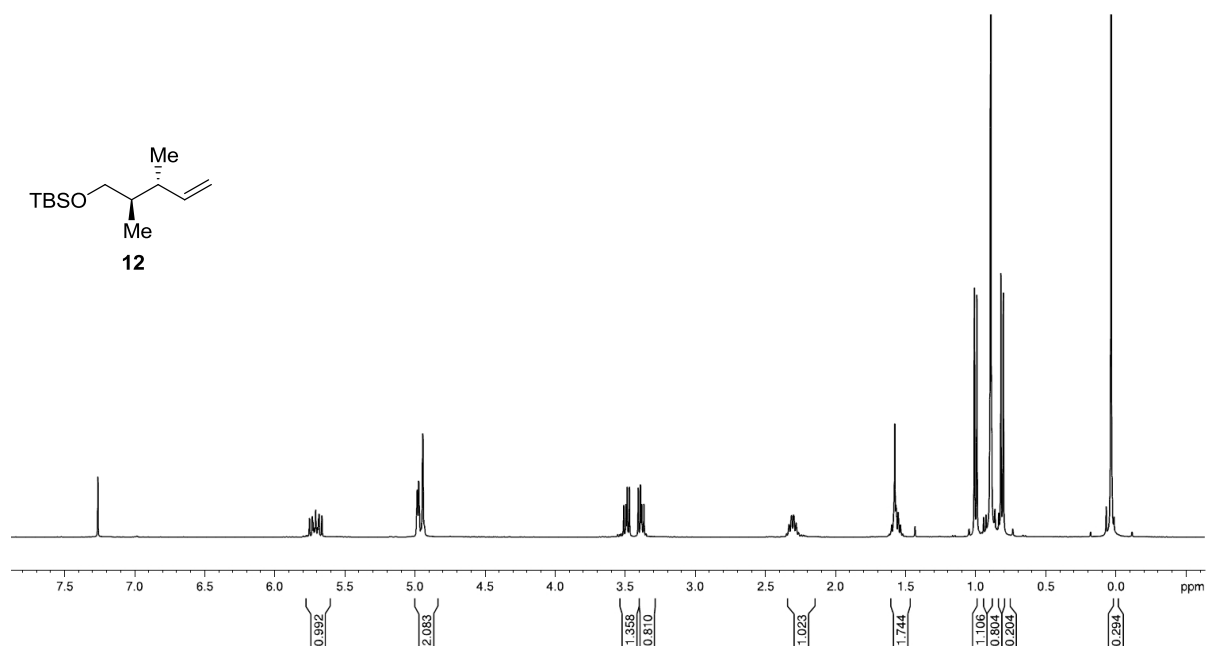

<sup>13</sup>C NMR spectrum of **12** (100 MHz, CDCl<sub>3</sub>)

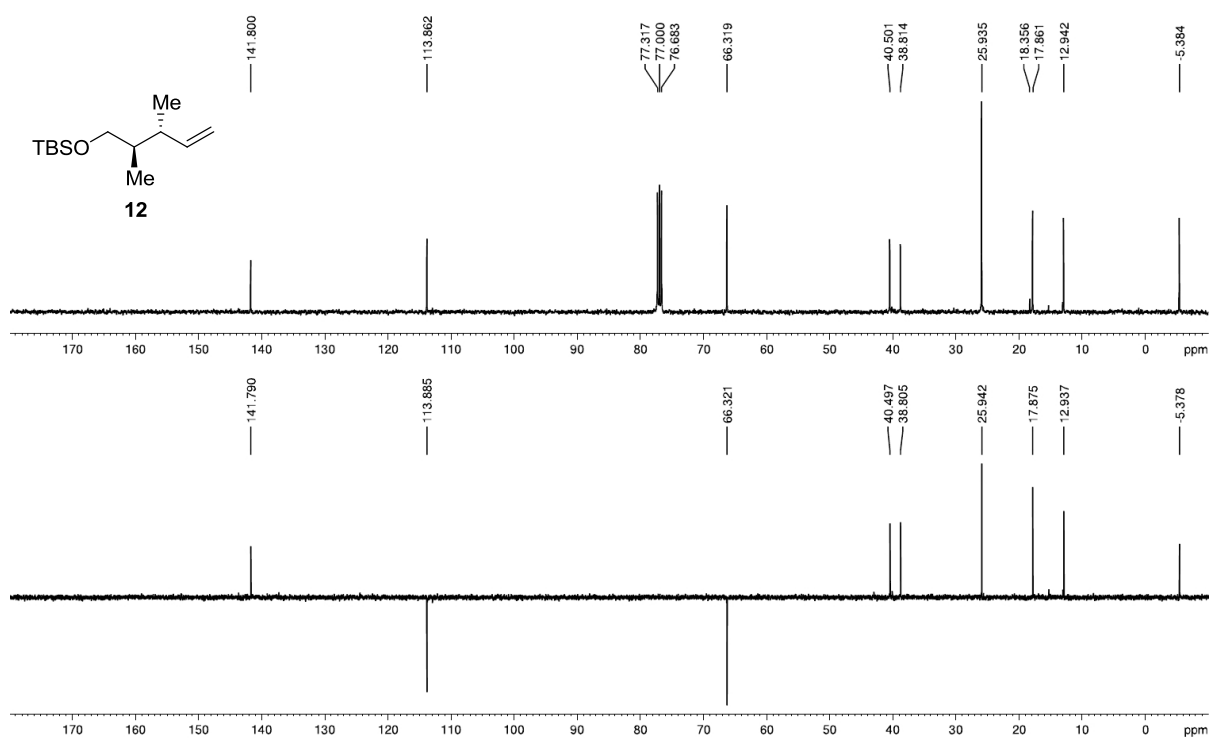



$^1\text{H}$  NMR spectrum of **5** (400 MHz,  $\text{CDCl}_3$ )

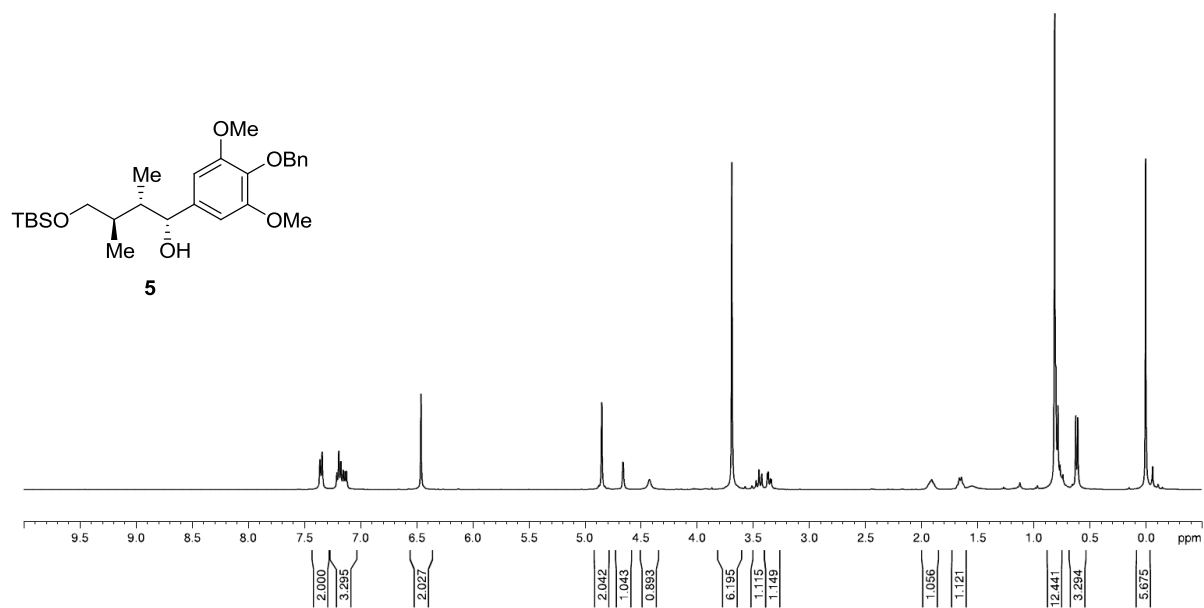

$^{13}\text{C}$  NMR spectrum of **5** (100 MHz,  $\text{CDCl}_3$ )

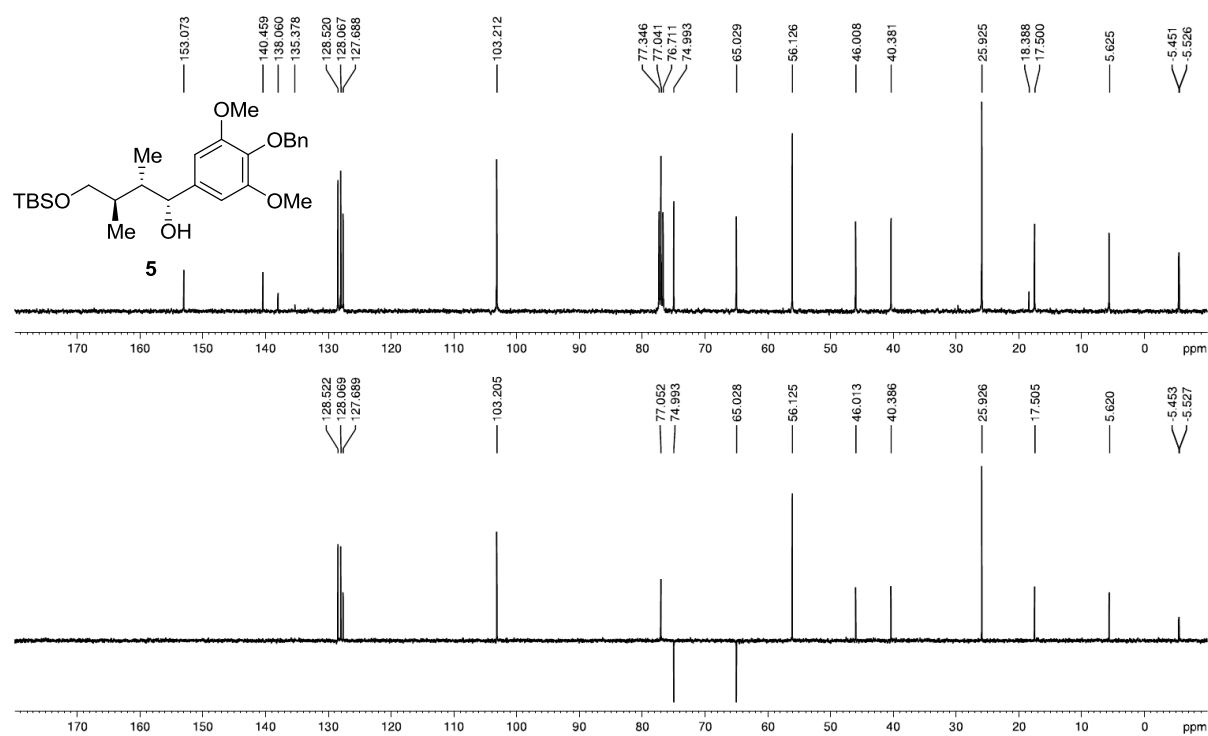

$^1\text{H}$  NMR spectrum of **6** (400 MHz,  $\text{CDCl}_3$ )

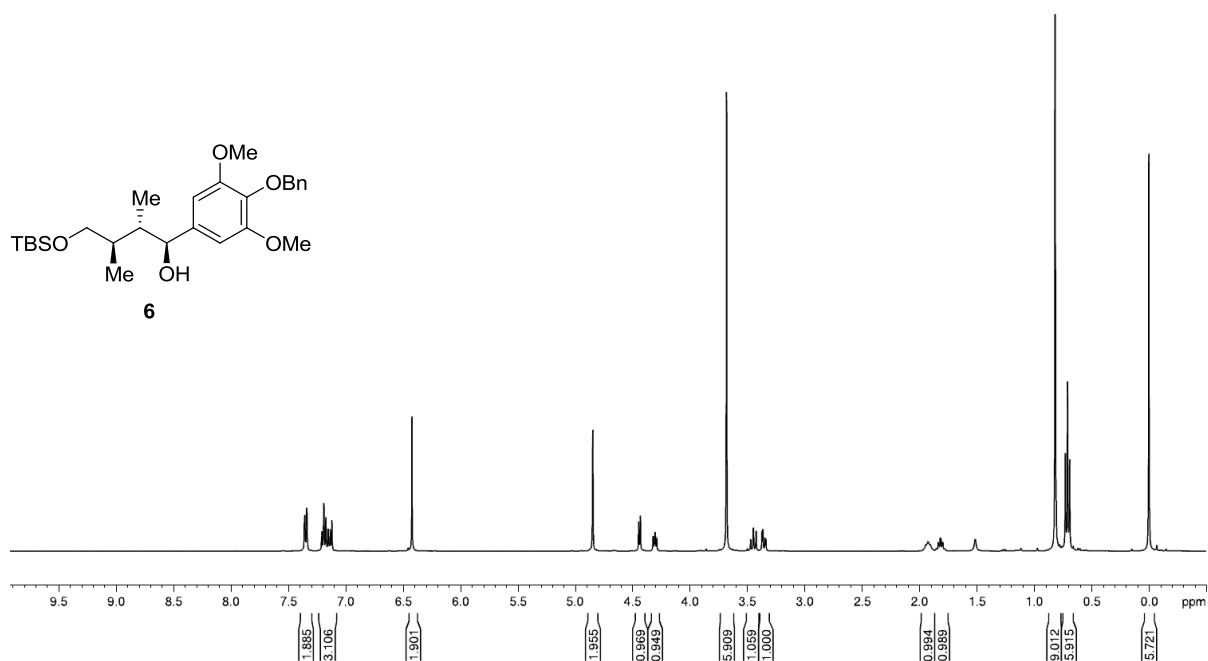

$^{13}\text{C}$  NMR spectrum of **6** (100 MHz,  $\text{CDCl}_3$ )

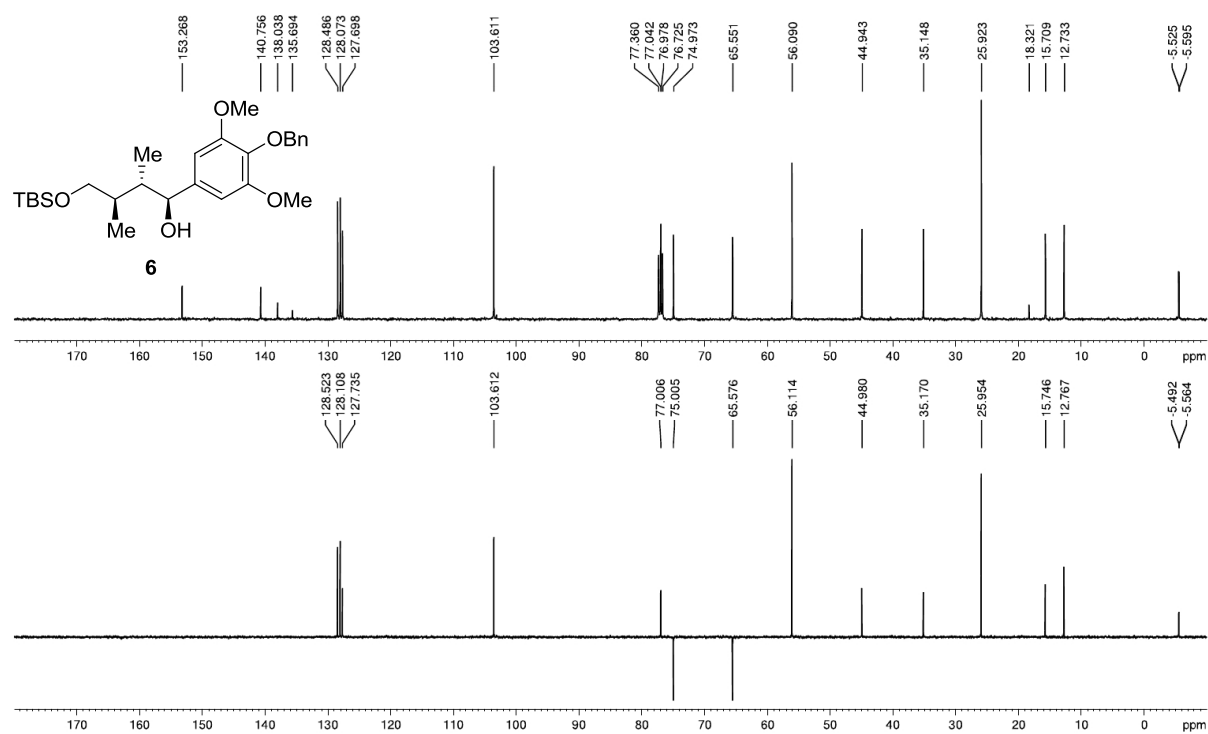

$^1\text{H}$  NMR spectrum of **16** (400 MHz,  $\text{CDCl}_3$ )

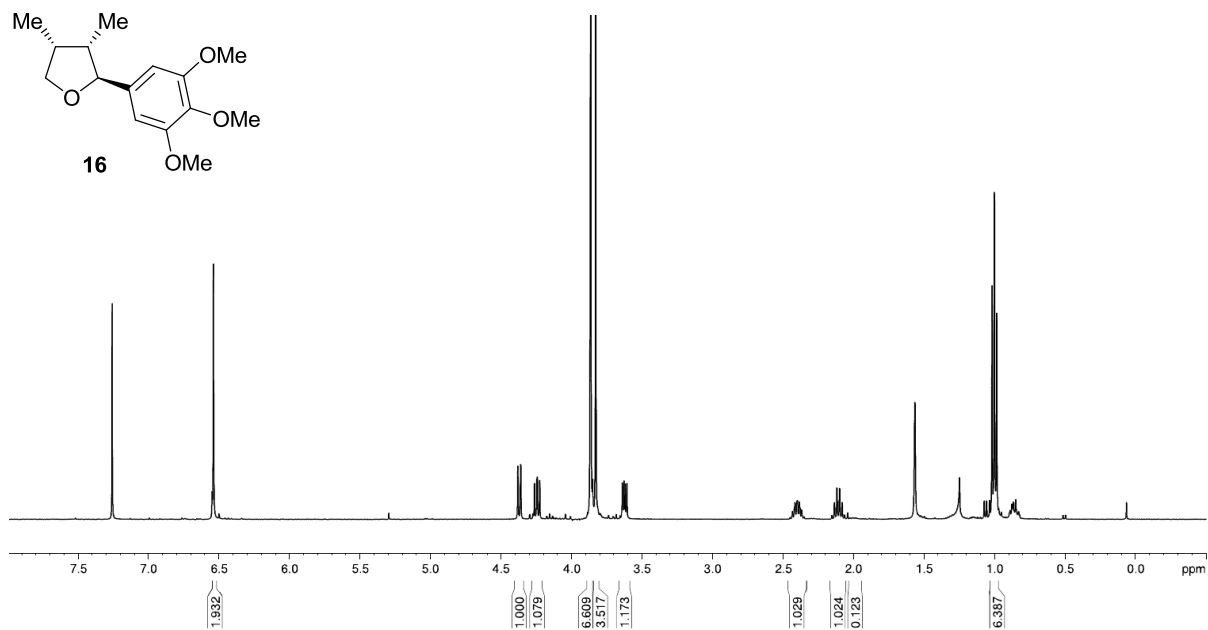

$^{13}\text{C}$  NMR spectrum of **16** (100 MHz,  $\text{CDCl}_3$ )

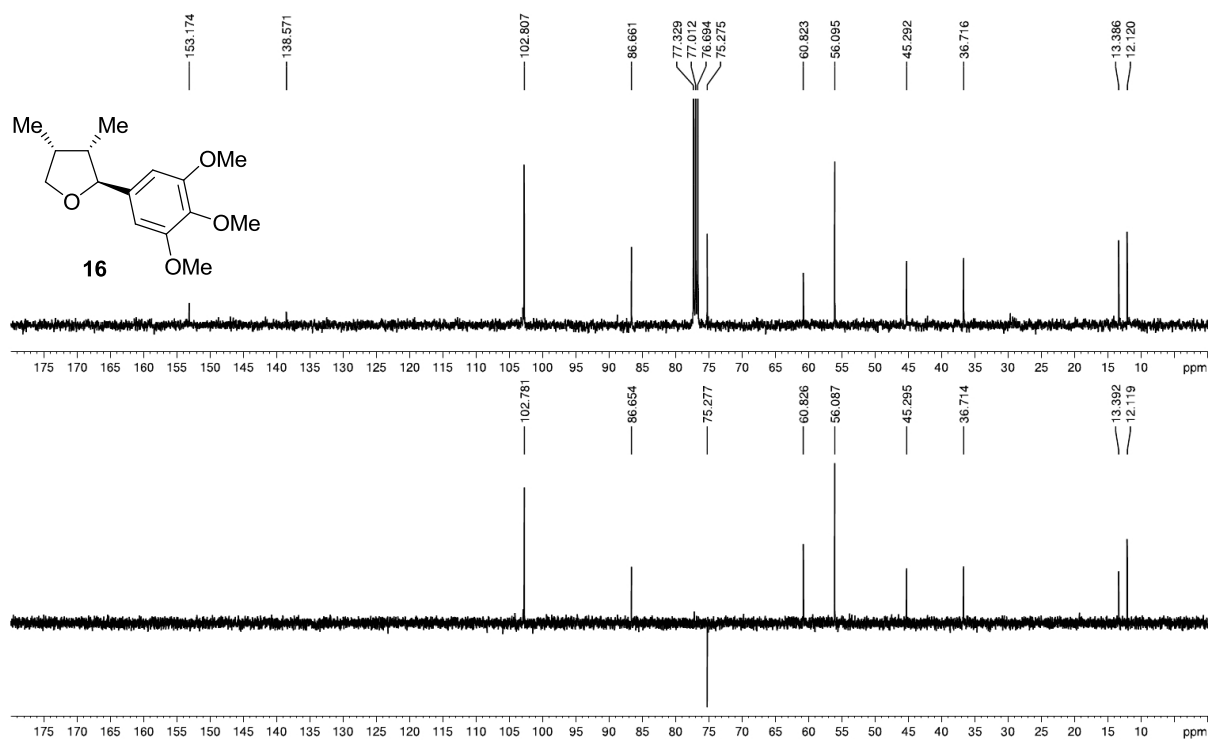

# NOE spectrum of **16** (500 MHz, CDCl<sub>3</sub>)

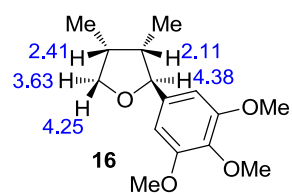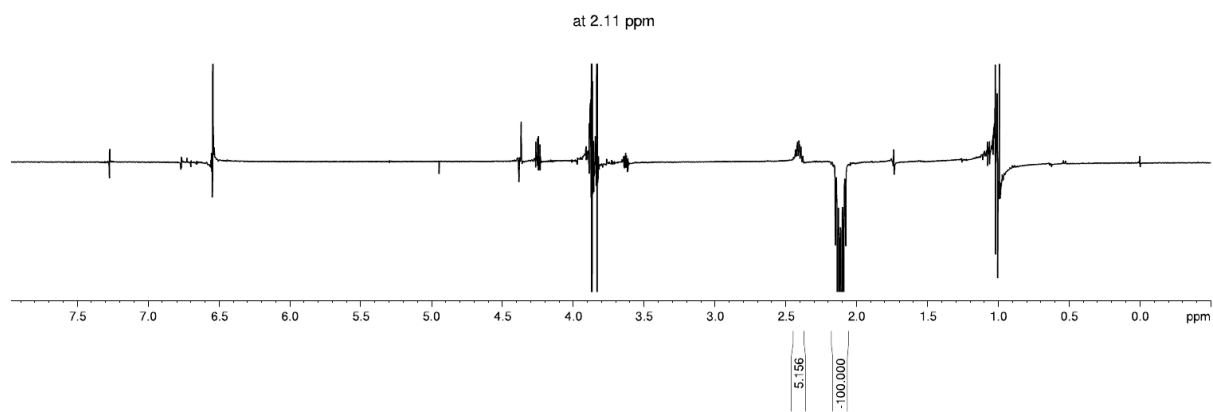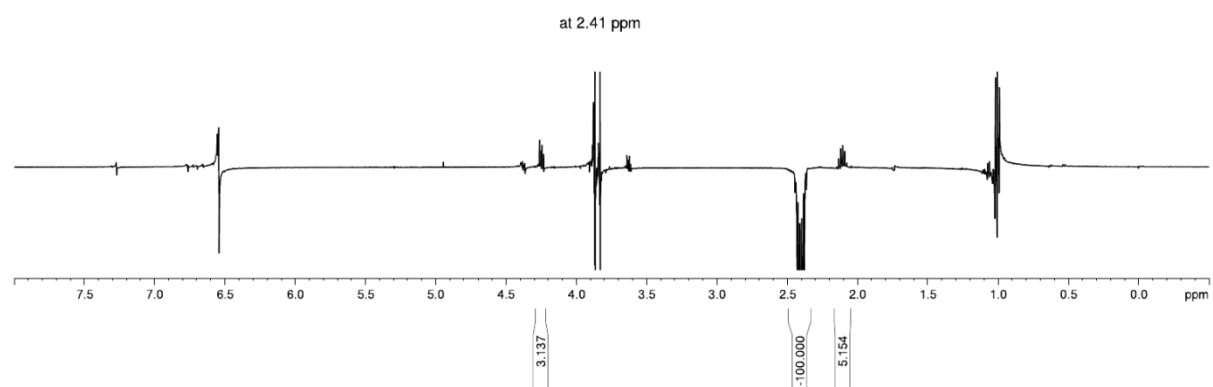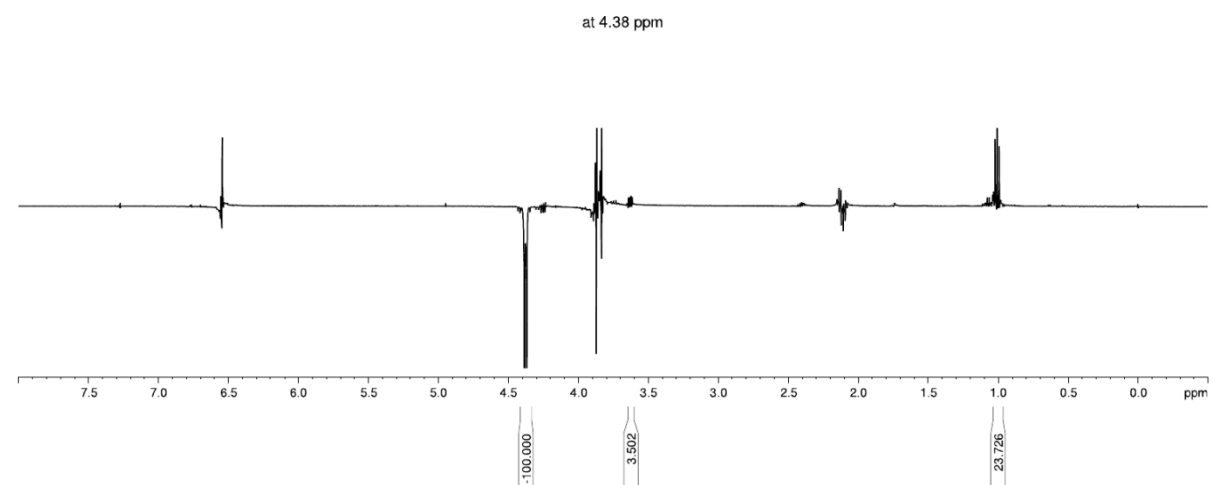

$^1\text{H}$  NMR spectrum of **18** (400 MHz,  $\text{CDCl}_3$ )

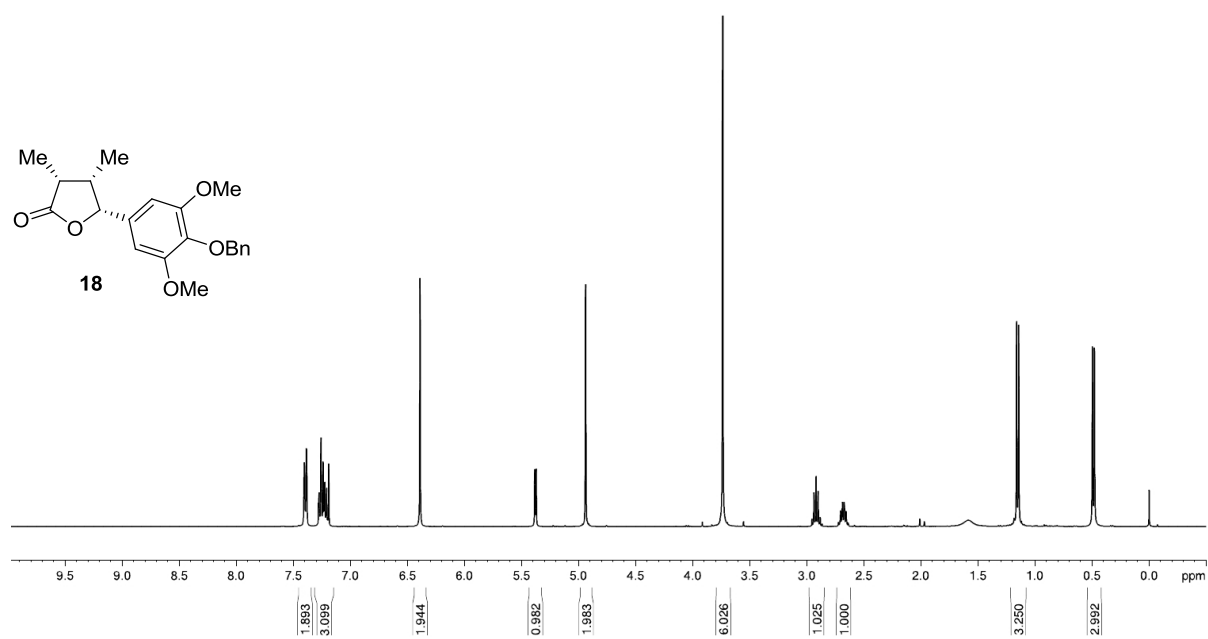

$^{13}\text{C}$  NMR spectrum of **18** (100 MHz,  $\text{CDCl}_3$ )

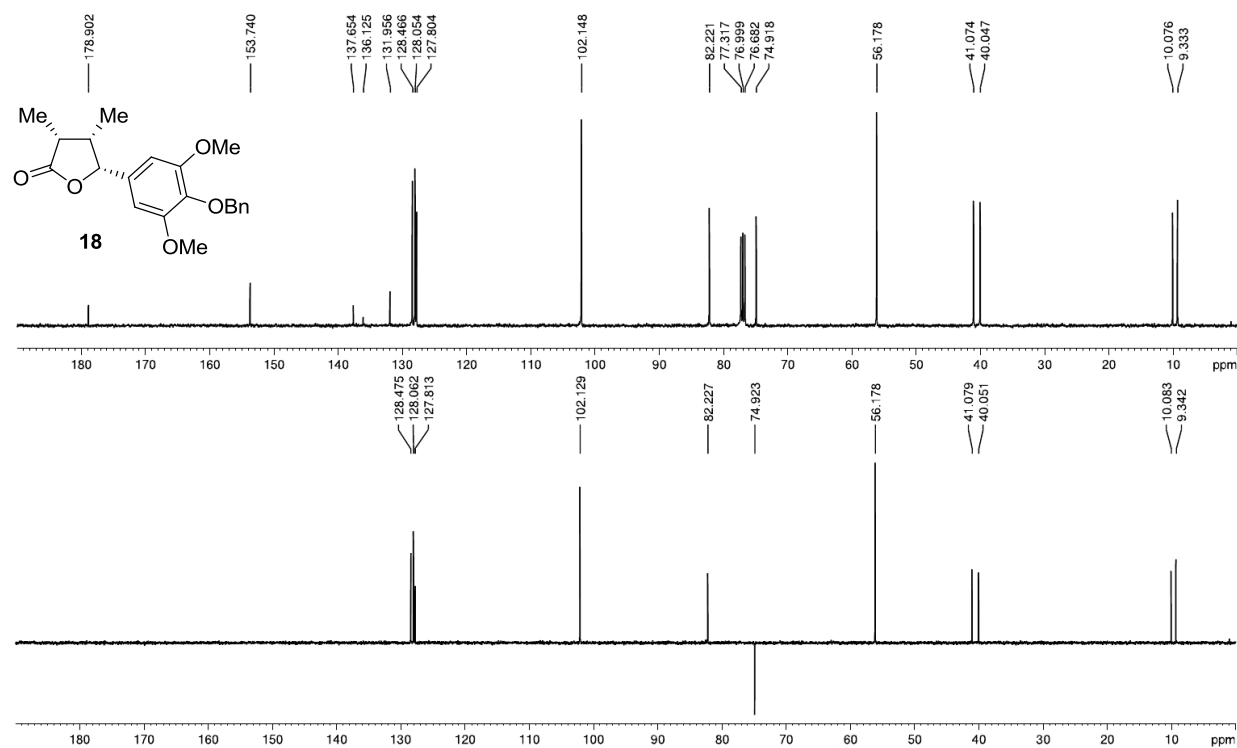

# NOE spectrum of **18** (500 MHz, CDCl<sub>3</sub>)

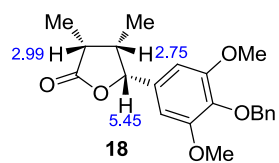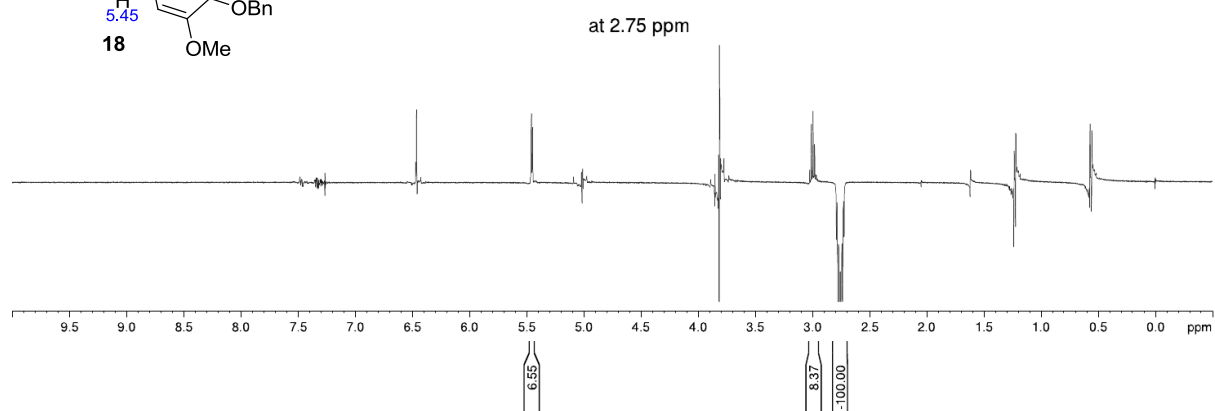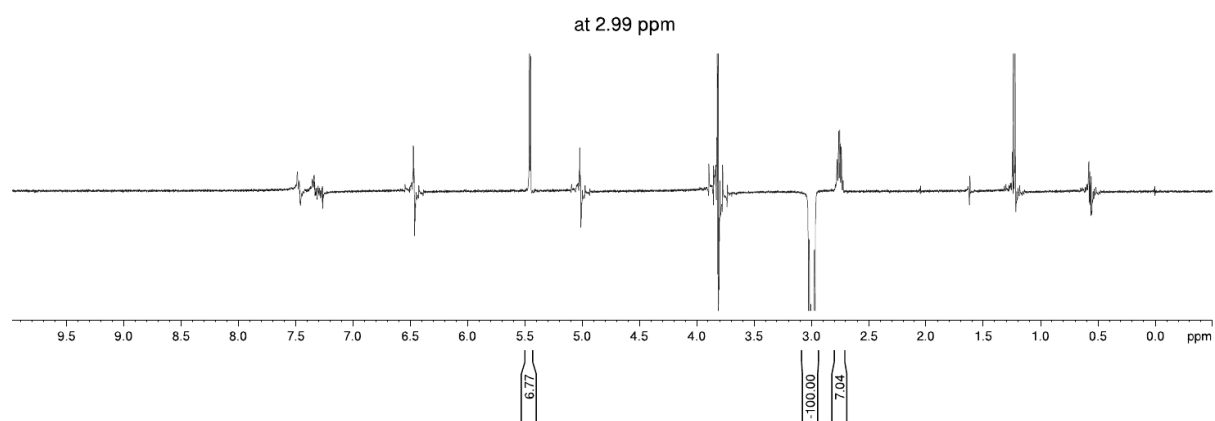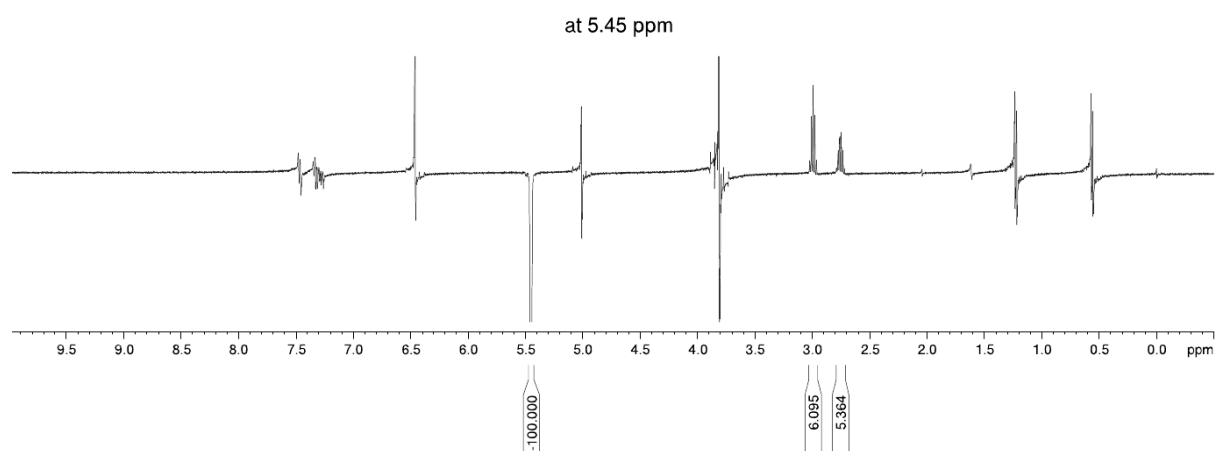

$^1\text{H}$  NMR spectrum of **19** (400 MHz,  $\text{CDCl}_3$ )

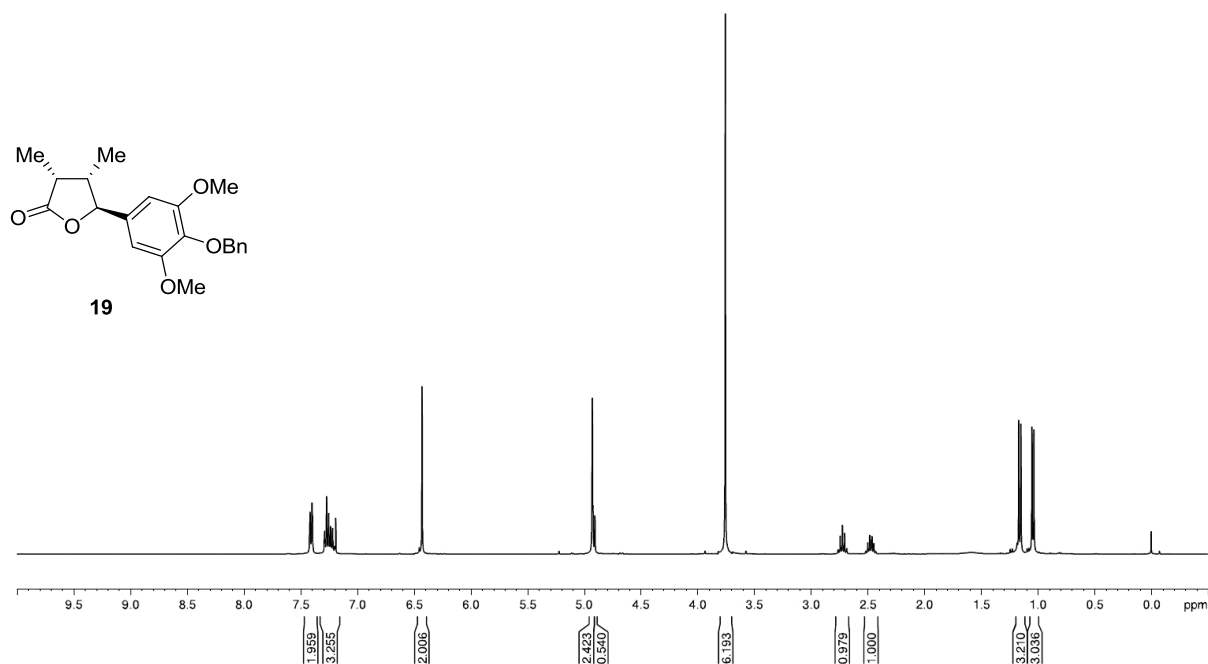

$^{13}\text{C}$  NMR spectrum of **19** (100 MHz,  $\text{CDCl}_3$ )

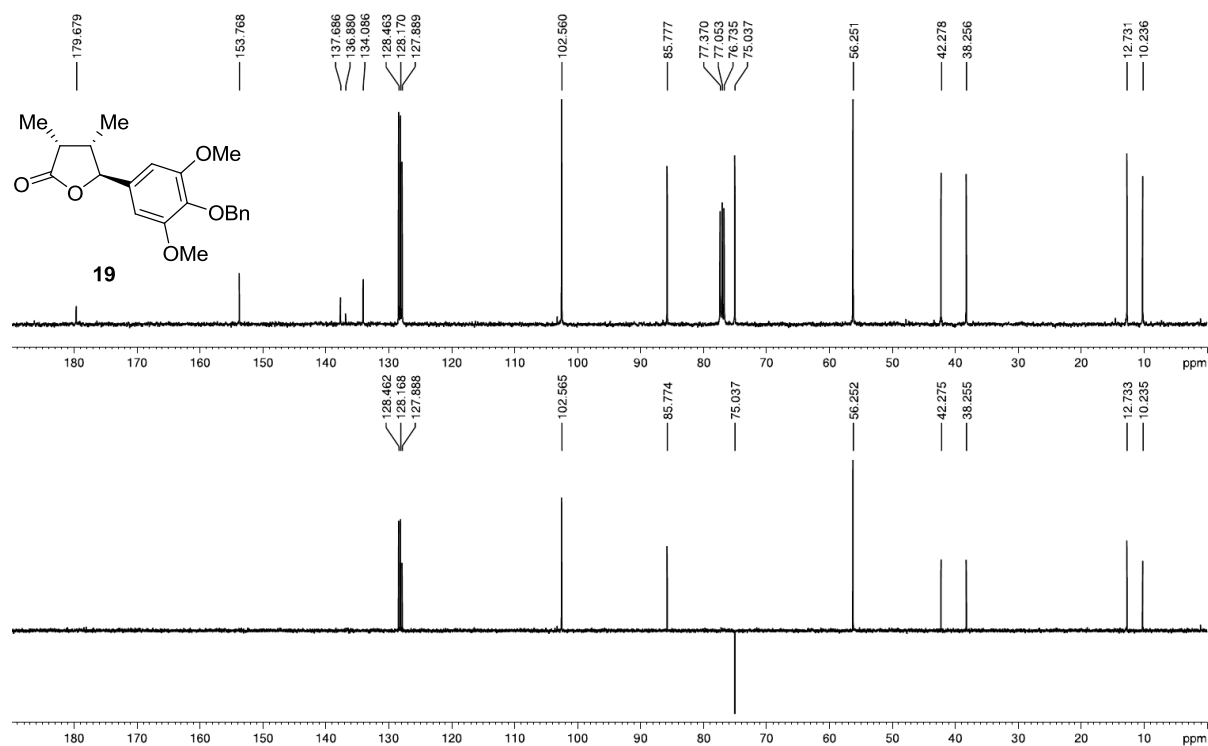

# NOE spectrum of **19** (500 MHz, CDCl<sub>3</sub>)

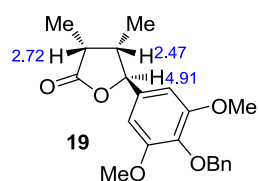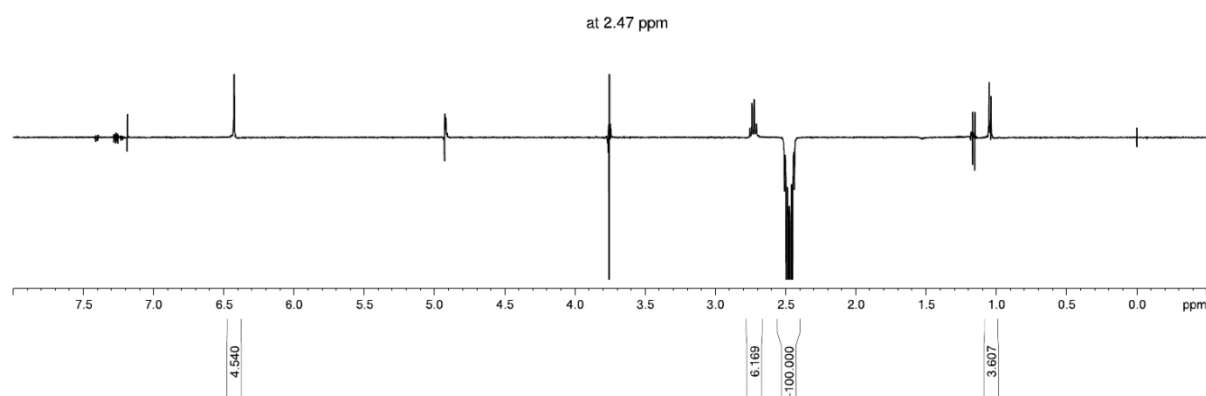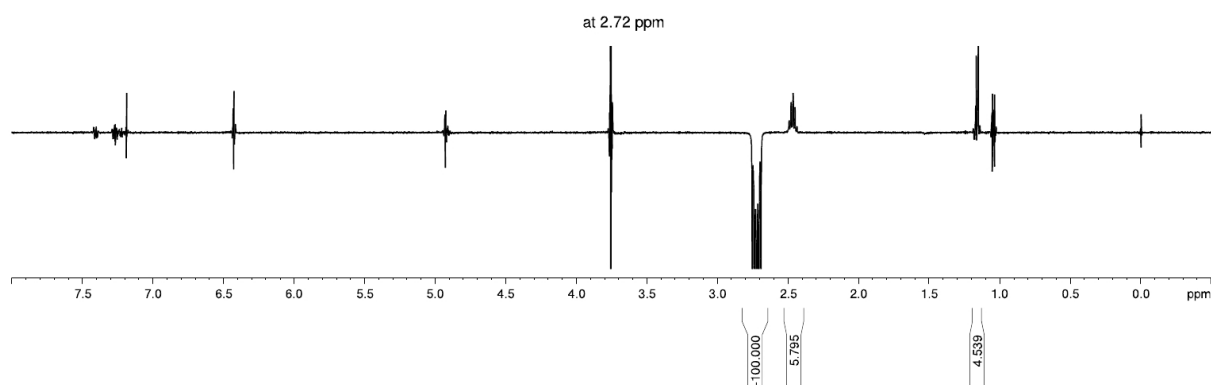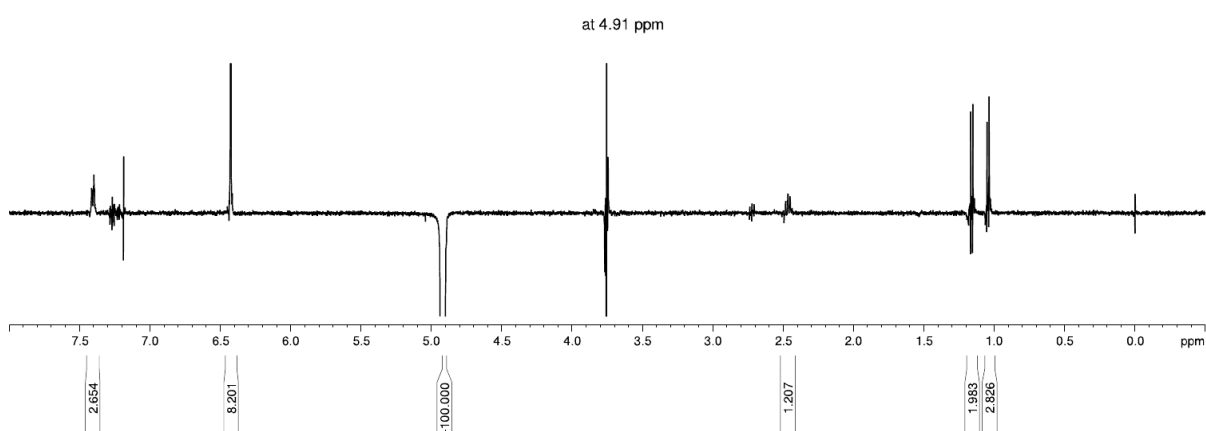



$^1\text{H}$  NMR spectrum of the crude compound **20** (400 MHz,  $\text{CDCl}_3$ )

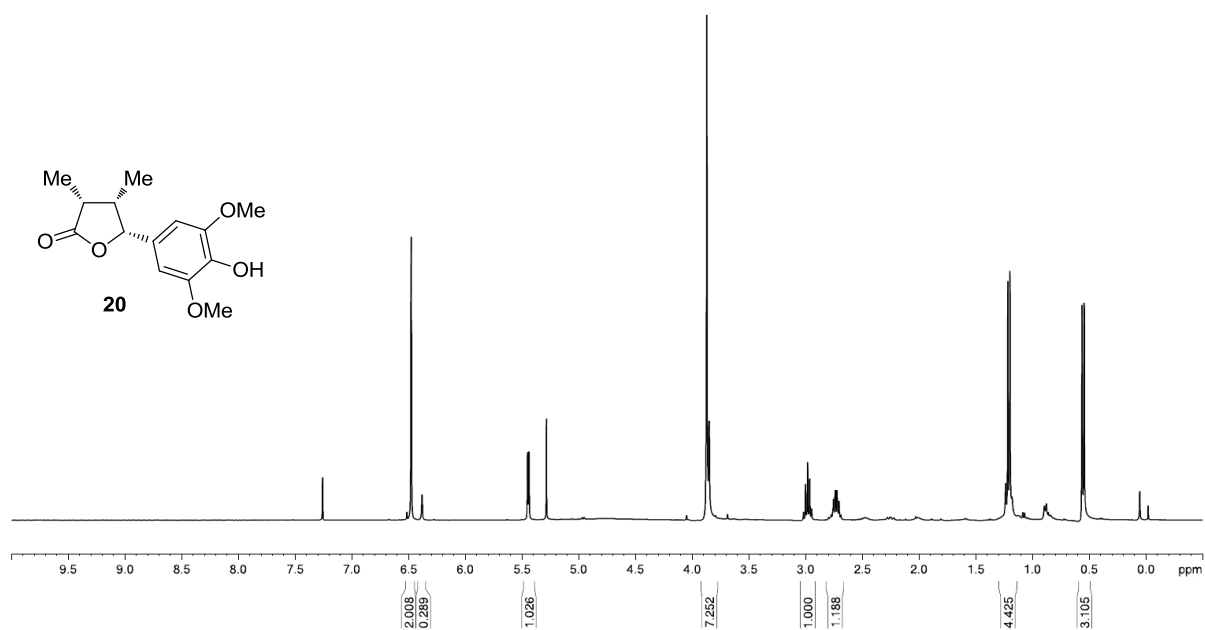

<sup>1</sup>H NMR spectrum of **3** (400 MHz, CDCl<sub>3</sub>)

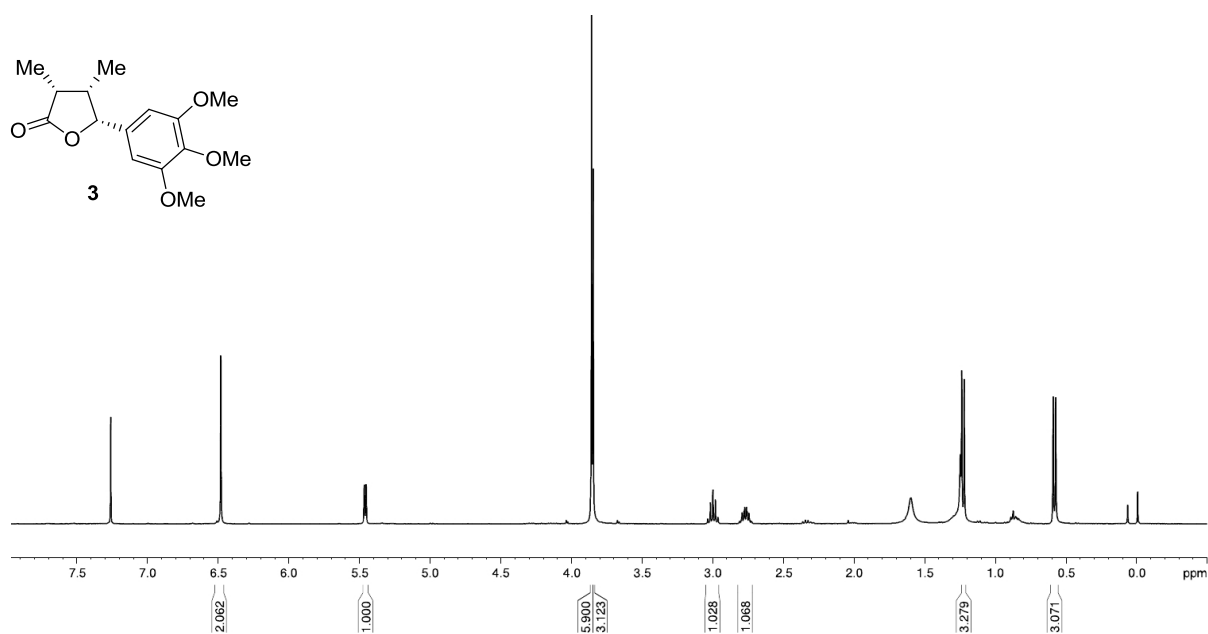

<sup>13</sup>C NMR spectrum of **3** (100 MHz, CDCl<sub>3</sub>)

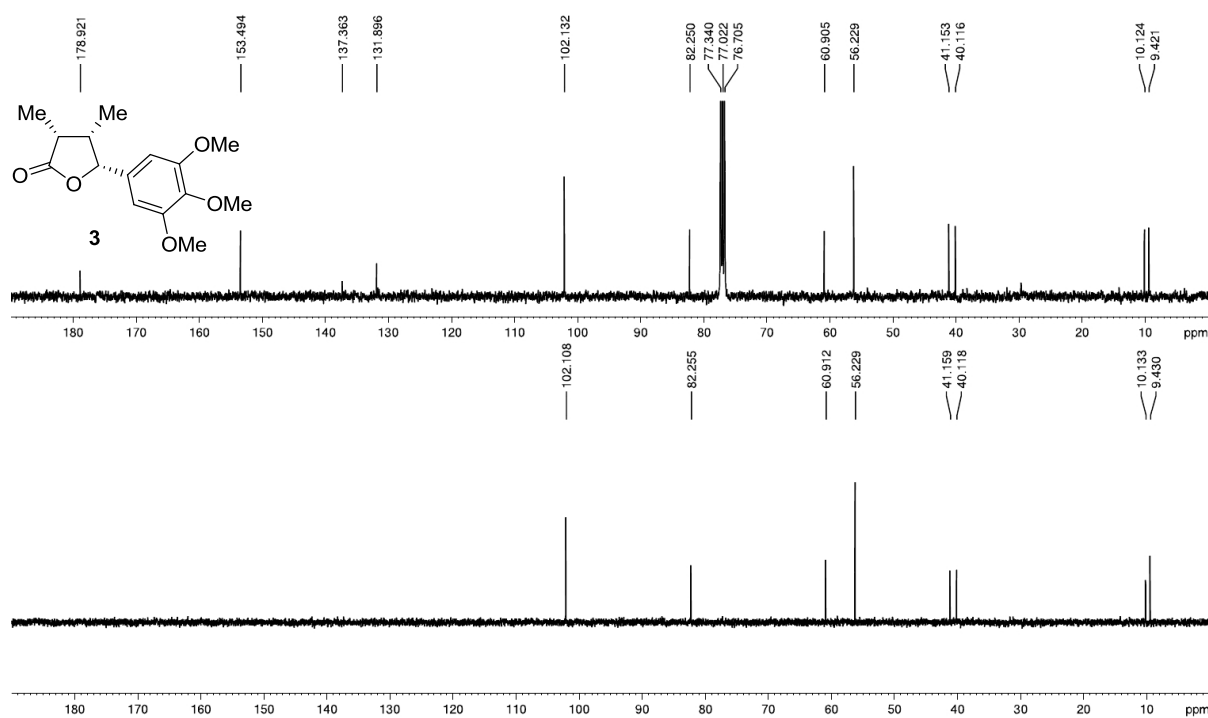

# NOE spectrum of **3** (500 MHz, CDCl<sub>3</sub>)

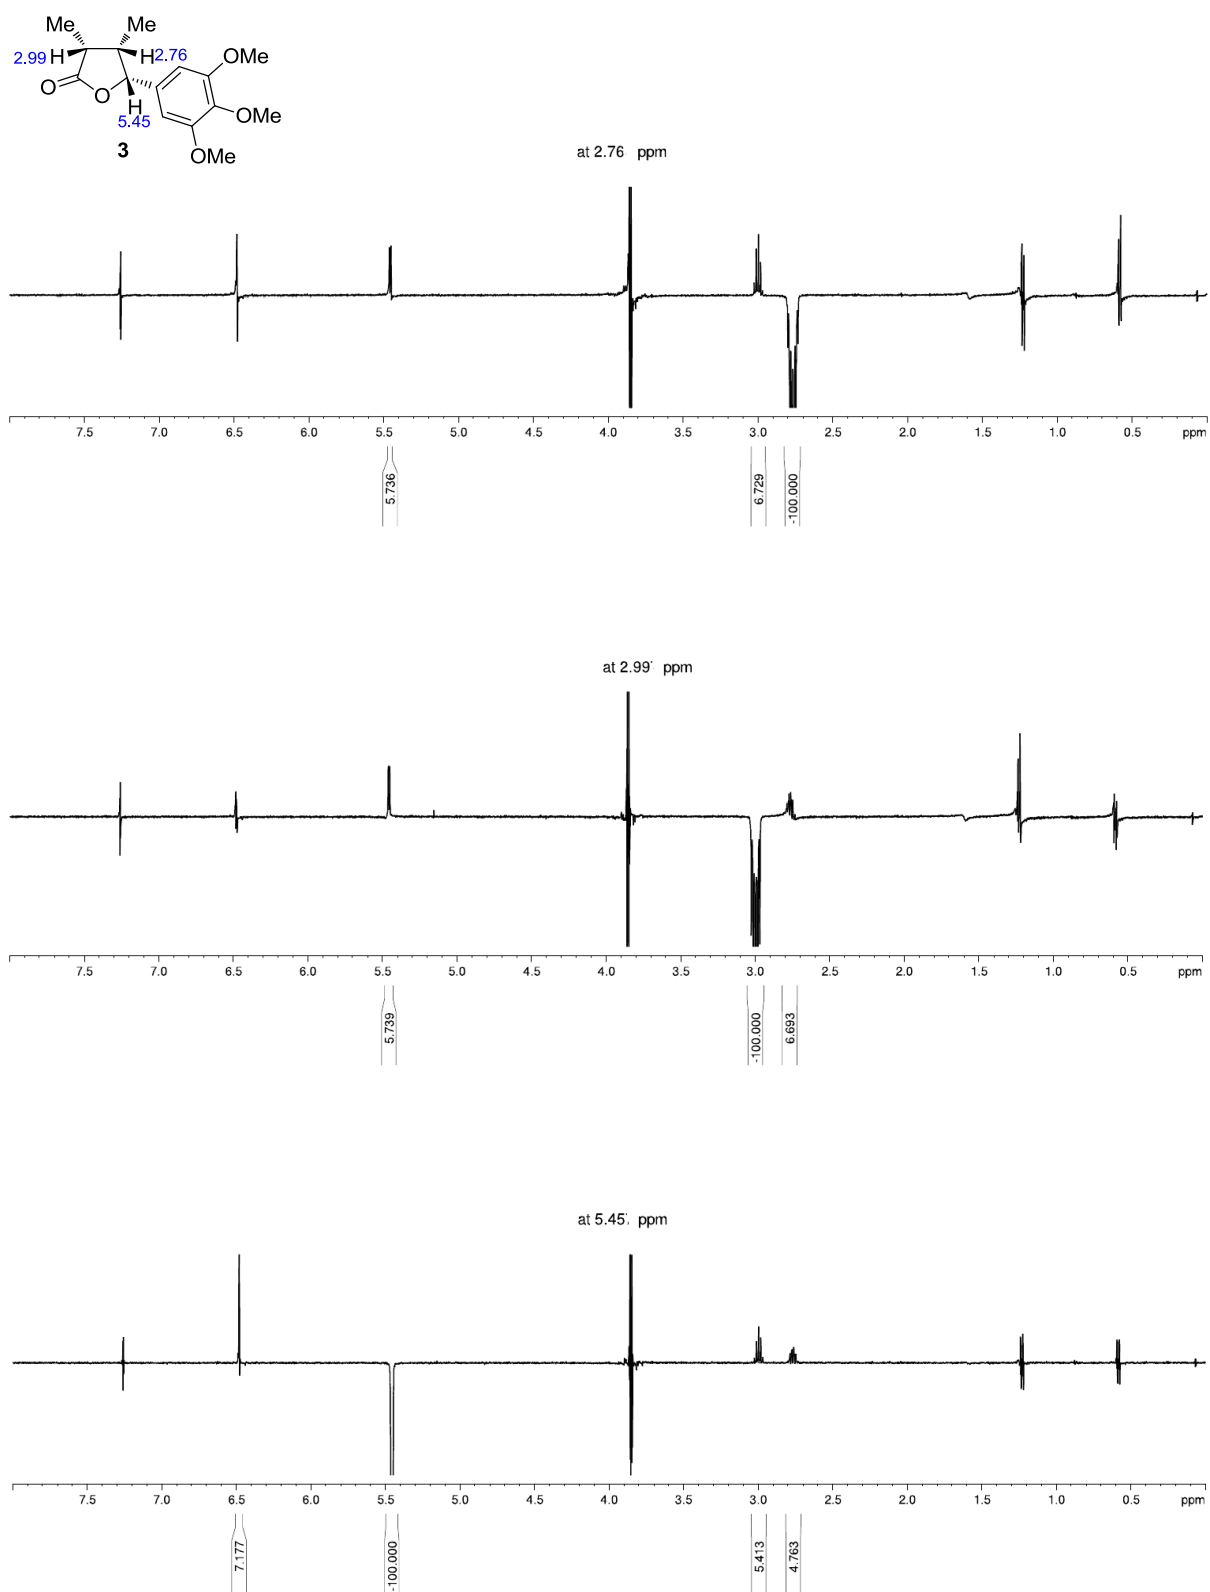

$^1\text{H}$  NMR spectrum of **4** (400 MHz,  $\text{CDCl}_3$ )

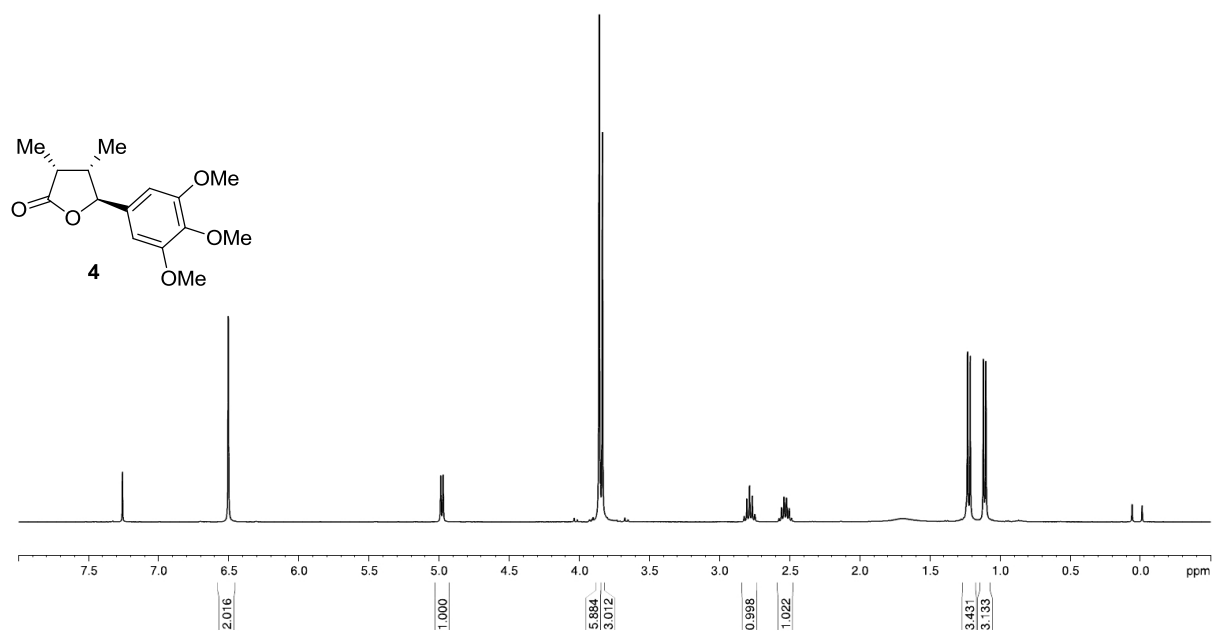

$^{13}\text{C}$  NMR spectrum of **4** (100 MHz,  $\text{CDCl}_3$ )

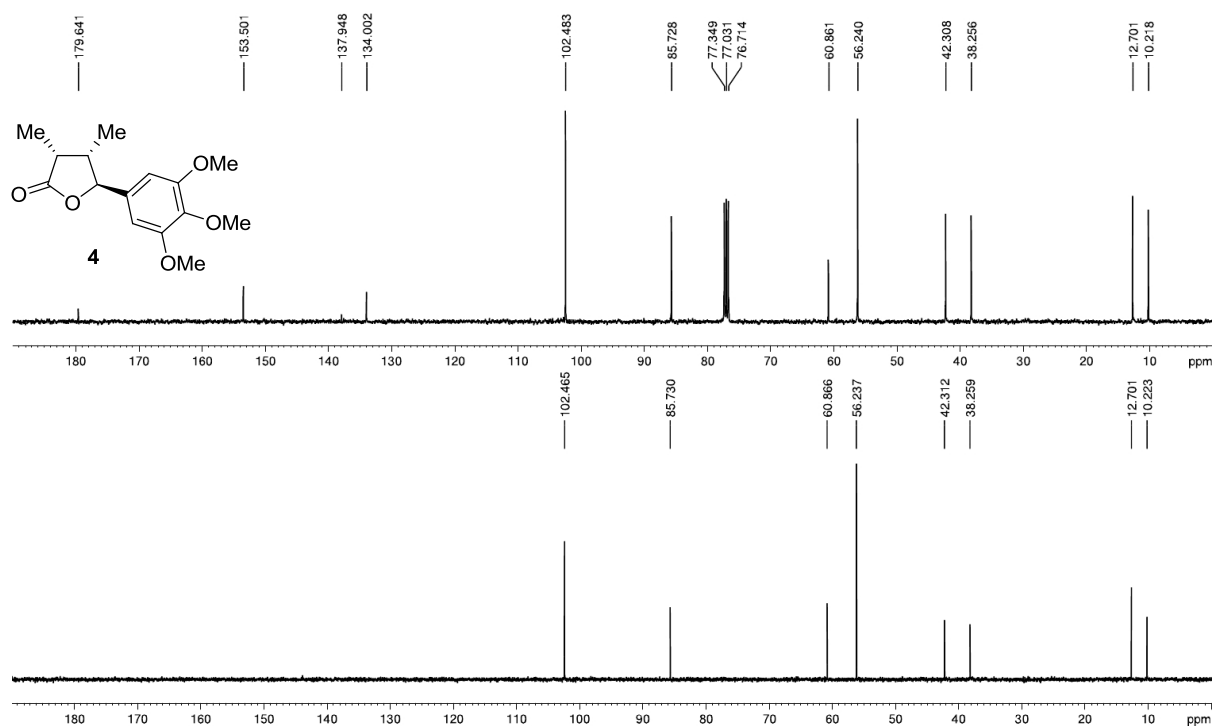

# NOE spectrum of **4** (500 MHz, CDCl<sub>3</sub>)

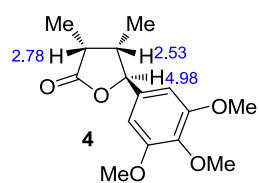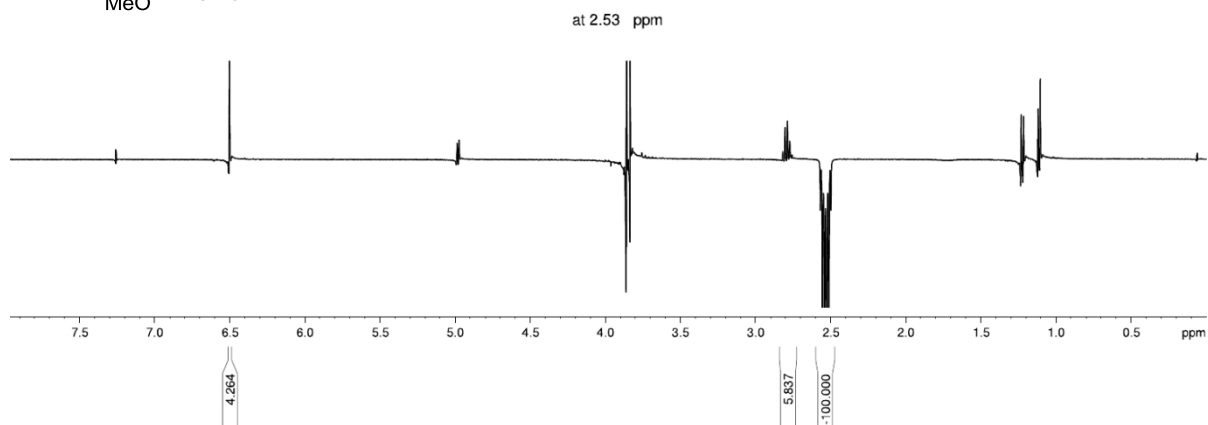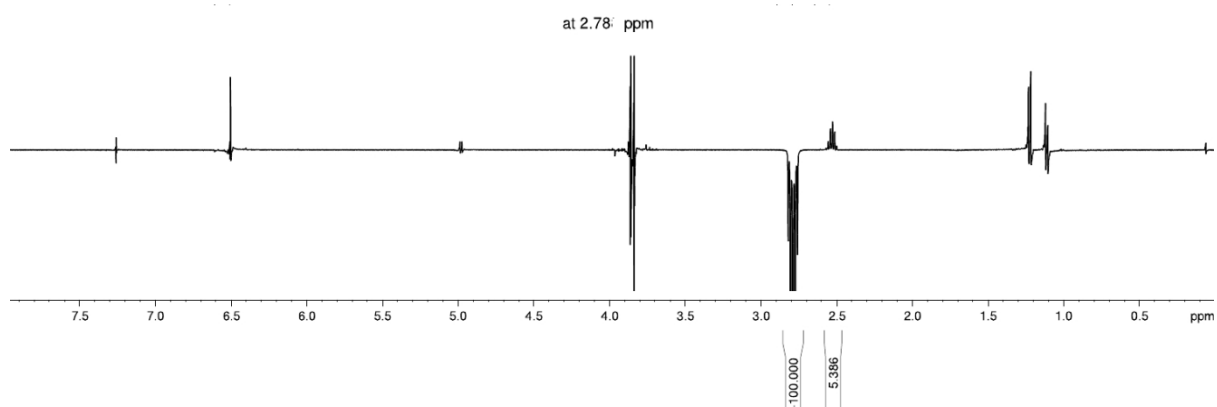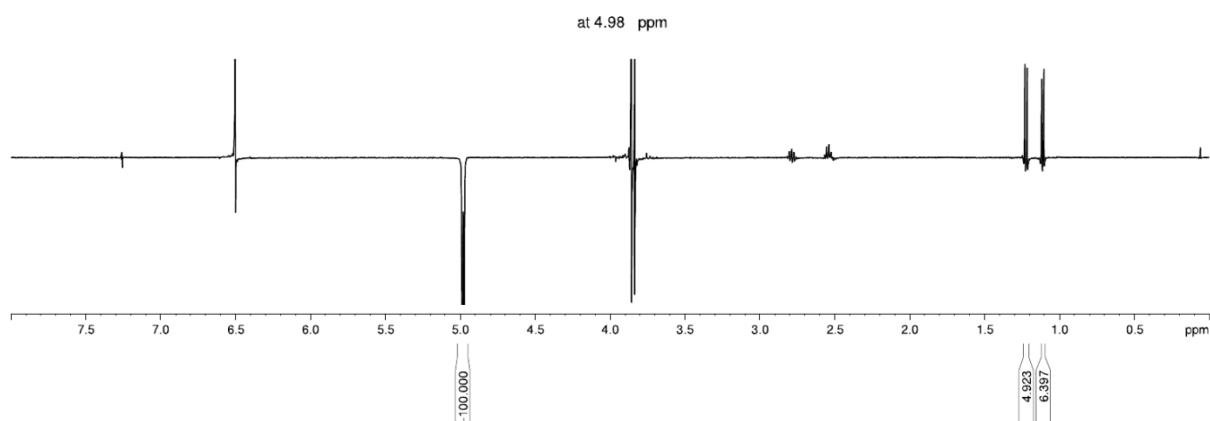

$^1\text{H}$  NMR spectrum of **22** (400 MHz,  $\text{CDCl}_3$ )

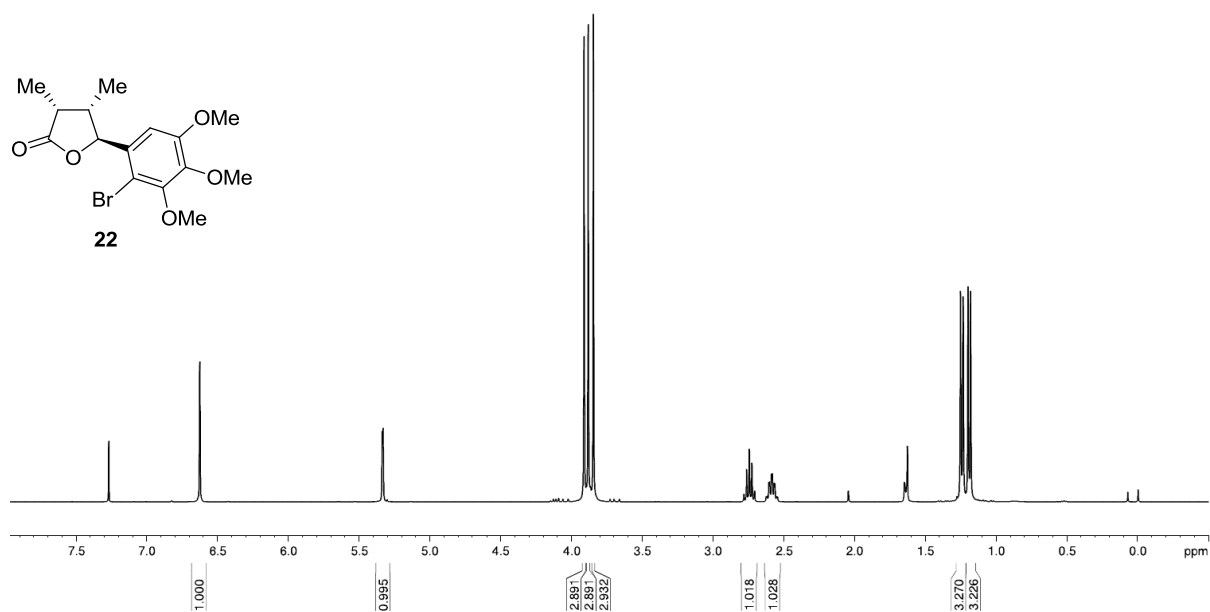

$^{13}\text{C}$  NMR spectrum of **22** (100 MHz,  $\text{CDCl}_3$ )

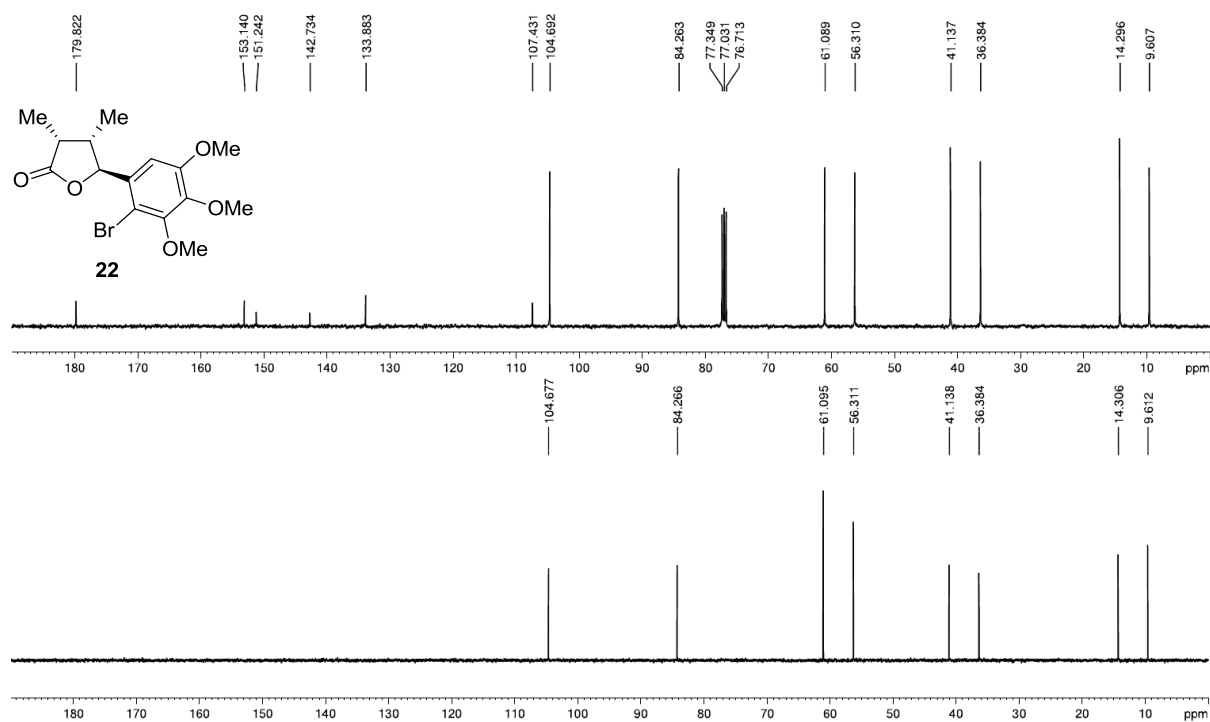

Supplement: c4ob01078g1.pdf [file c4ob01078g1.pdf]
